# Supplementary material for: The First Molecular Detection of Aedes albopictus in Sudan Associates with Increased Outbreaks of Chikungunya and Dengue
Source: MDPI journal article supplement (doi:10.3390/ijms231911802), 2022-10-05
Supplement: s1 [file s1]

**Supplementary file table S1:** The accession numbers of all *Ae. albopictus* sequences that we downloaded from the NCBI GenBank database [28], and sorted based on country of isolation and used in the phylogenetic and haplotype analyses.

| Accession  | Species               | Country  |
|------------|-----------------------|----------|
| MF148286.1 | <i>Ae. albopictus</i> | Malaysia |
| MF148270.1 | <i>Ae. albopictus</i> | Malaysia |
| MF148288.1 | <i>Ae. Albopictus</i> | Malaysia |
| MF148263.1 | <i>Ae. albopictus</i> | Malaysia |
| MF148261.1 | <i>Ae. albopictus</i> | Malaysia |
| KY982359.1 | <i>Ae. albopictus</i> | Malaysia |
| KY982342.1 | <i>Ae. albopictus</i> | Malaysia |
| KU738424.1 | <i>Ae. albopictus</i> | China    |
| KX383926.1 | <i>Ae. albopictus</i> | Thailand |
| MF148287.1 | <i>Ae. albopictus</i> | Malaysia |
| MF148284.1 | <i>Ae. albopictus</i> | Malaysia |
| MF148283.1 | <i>Ae. albopictus</i> | Malaysia |
| MF148265.1 | <i>Ae. albopictus</i> | Malaysia |
| MF148254.1 | <i>Ae. albopictus</i> | Malaysia |
| KY982366.1 | <i>Ae. albopictus</i> | Malaysia |
| KY982364.1 | <i>Ae. albopictus</i> | Malaysia |
| KY982360.1 | <i>Ae. albopictus</i> | Malaysia |
| KY982356.1 | <i>Ae. albopictus</i> | Malaysia |
| KY982355.1 | <i>Ae. albopictus</i> | Malaysia |
| KY982353.1 | <i>Ae. albopictus</i> | Malaysia |
| KY982334.1 | <i>Ae. albopictus</i> | Malaysia |
| KU738429.1 | <i>Ae. albopictus</i> | China    |
| KU738425.1 | <i>Ae. albopictus</i> | China    |
| KX383934.1 | <i>Ae. albopictus</i> | China    |
| KX383928.1 | <i>Ae. albopictus</i> | Thailand |
| KX383927.1 | <i>Ae. albopictus</i> | Greece   |
| KX383925.1 | <i>Ae. albopictus</i> | Thailand |
| KX383923.1 | <i>Ae. albopictus</i> | Italy    |
| KY982357.1 | <i>Ae. albopictus</i> | Malaysia |
| MN513366.1 | <i>Ae. albopictus</i> | Portugal |
| MN513365.1 | <i>Ae. albopictus</i> | Portugal |
| MN513361.1 | <i>Ae. albopictus</i> | Portugal |
| MN513359.1 | <i>Ae. albopictus</i> | Portugal |
| MN513357.1 | <i>Ae. albopictus</i> | Portugal |
| MN513355.1 | <i>Ae. albopictus</i> | Portugal |
| MN513354.1 | <i>Ae. albopictus</i> | Portugal |
| MN513353.1 | <i>Ae. albopictus</i> | Portugal |
| MN513352.1 | <i>Ae. albopictus</i> | Portugal |

|            |                |          |
|------------|----------------|----------|
| MF148285.1 | Ae. albopictus | Malaysia |
| MF148282.1 | Ae. albopictus | Malaysia |
| MF148280.1 | Ae. albopictus | Malaysia |
| MF148279.1 | Ae. albopictus | Malaysia |
| MF148268.1 | Ae. albopictus | Malaysia |
| MF148267.1 | Ae. albopictus | Malaysia |
| MF148260.1 | Ae. albopictus | Malaysia |
| MF148258.1 | Ae. albopictus | Malaysia |
| KY982354.1 | Ae. albopictus | Malaysia |
| KY982341.1 | Ae. albopictus | Malaysia |
| KU738427.1 | Ae. albopictus | China    |
| KU738407.1 | Ae. albopictus | China    |
| KU738386.1 | Ae. albopictus | China    |
| KX383933.1 | Ae. albopictus | Italy    |
| KX383932.1 | Ae. albopictus | Greece   |
| KX383931.1 | Ae. albopictus | Albania  |
| KX383930.1 | Ae. albopictus | Albania  |
| KX383929.1 | Ae. albopictus | Italy    |
| KX383921.1 | Ae. albopictus | Italy    |
| KX383916.1 | Ae. albopictus | Italy    |
| KR068634.1 | Ae. albopictus | China    |
| MN513364.1 | Ae. albopictus | Portugal |
| MF148259.1 | Ae. albopictus | Malaysia |
| MF148252.1 | Ae. albopictus | Malaysia |
| KY982340.1 | Ae. albopictus | Malaysia |
| KY982335.1 | Ae. albopictus | Malaysia |
| KU738430.1 | Ae. albopictus | China    |
| KU738408.1 | Ae. albopictus | China    |
| KU738406.1 | Ae. albopictus | China    |
| KU738401.1 | Ae. albopictus | China    |
| KX383920.1 | Ae. albopictus | Italy    |
| KX383919.1 | Ae. albopictus | USA      |
| KX383918.1 | Ae. albopictus | Italy    |
| KX383917.1 | Ae. albopictus | USA      |
| KY982336.1 | Ae. albopictus | Malaysia |
| JQ004525.1 | Ae. albopictus | Japan    |
| MT993476.1 | Ae. albopictus | Greece   |
| KY982362.1 | Ae. albopictus | Malaysia |
| KX809765.1 | Ae. albopictus | Japan    |
| MF148255.1 | Ae. albopictus | Malaysia |
| MN513368.1 | Ae. albopictus | Portugal |
| MN513367.1 | Ae. albopictus | Portugal |
| MN513362.1 | Ae. albopictus | Portugal |

|                |                |             |
|----------------|----------------|-------------|
| MF148256.1     | Ae. albopictus | Malaysia    |
| JQ004524.1     | Ae. albopictus | Japan       |
| KX809764.1     | Ae. albopictus | Philippines |
| KX809761.1     | Ae. albopictus | Philippines |
| MK575475.1     | Ae. albopictus | Brazil      |
| KY982339.1     | Ae. albopictus | Malaysia    |
| KX809763.1     | Ae. albopictus | Philippines |
| KX383935.1     | Ae. albopictus | Philippines |
| NC 006817.1    | Ae. albopictus | Taiwan      |
| XR 003893871.1 | Ae. albopictus | Italy       |
| KY982337.1     | Ae. albopictus | Malaysia    |
| KY971594.1     | Ae. albopictus | China       |
| XR 003893569.1 | Ae. albopictus | Italy       |
| KY971591.1     | Ae. albopictus | China       |
| KY982338.1     | Ae. albopictus | Malaysia    |
| MG871396.1     | Ae. albopictus | South Korea |
| MG871393.1     | Ae. albopictus | South Korea |
| MG871378.1     | Ae. albopictus | South Korea |
| KY971599.1     | Ae. albopictus | China       |
| KY971596.1     | Ae. albopictus | China       |
| KY971592.1     | Ae. albopictus | China       |
| KY971602.1     | Ae. albopictus | China       |
| MG871401.1     | Ae. albopictus | South Korea |
| MG871400.1     | Ae. albopictus | South Korea |
| MG871399.1     | Ae. albopictus | South Korea |
| MG871398.1     | Ae. albopictus | South Korea |
| MG871397.1     | Ae. albopictus | South Korea |
| MG871395.1     | Ae. albopictus | South Korea |
| MG871394.1     | Ae. albopictus | South Korea |
| MG871392.1     | Ae. albopictus | South Korea |
| MG871365.1     | Ae. albopictus | South Korea |
| KY971598.1     | Ae. albopictus | China       |
| MG871391.1     | Ae. albopictus | South Korea |
| MG871390.1     | Ae. albopictus | South Korea |
| MG871388.1     | Ae. albopictus | South Korea |
| MG871386.1     | Ae. albopictus | South Korea |
| MG871384.1     | Ae. albopictus | South Korea |
| MG871383.1     | Ae. albopictus | South Korea |
| MG871382.1     | Ae. albopictus | South Korea |
| MG871381.1     | Ae. albopictus | South Korea |
| MG871380.1     | Ae. albopictus | South Korea |
| MG871379.1     | Ae. albopictus | South Korea |
| MG871377.1     | Ae. albopictus | South Korea |

|            |                |             |
|------------|----------------|-------------|
| MG871376.1 | Ae. albopictus | South Korea |
| MG871375.1 | Ae. albopictus | South Korea |
| MG871374.1 | Ae. albopictus | South Korea |
| MG871373.1 | Ae. albopictus | South Korea |
| MG871372.1 | Ae. albopictus | South Korea |
| MG871371.1 | Ae. albopictus | South Korea |
| MG871370.1 | Ae. albopictus | South Korea |
| MG871369.1 | Ae. albopictus | South Korea |
| MG871368.1 | Ae. albopictus | South Korea |
| MG871367.1 | Ae. albopictus | South Korea |
| MG871366.1 | Ae. albopictus | South Korea |
| KY971593.1 | Ae. albopictus | China       |
| MG871402.1 | Ae. albopictus | South Korea |
| MG871389.1 | Ae. albopictus | South Korea |
| MG871387.1 | Ae. albopictus | South Korea |
| MG871385.1 | Ae. albopictus | South Korea |
| KY971601.1 | Ae. albopictus | China       |
| KY971597.1 | Ae. albopictus | China       |
| KC690922.1 | Ae. albopictus | USA         |
| KC690929.1 | Ae. albopictus | USA         |
| MW279079.1 | Ae. albopictus | Brazil      |
| MW279069.1 | Ae. albopictus | Spain       |
| KC690940.1 | Ae. albopictus | USA         |
| MW279070.1 | Ae. albopictus | Spain       |
| KC690951.1 | Ae. albopictus | USA         |
| KC690941.1 | Ae. albopictus | USA         |
| KC690935.1 | Ae. albopictus | USA         |
| KC690930.1 | Ae. albopictus | USA         |
| KC690928.1 | Ae. albopictus | USA         |
| KC690924.1 | Ae. albopictus | USA         |
| KC690912.1 | Ae. albopictus | USA         |
| KC690906.1 | Ae. albopictus | USA         |
| MH817501.1 | Ae. albopictus | Russia      |
| MF185673.1 | Ae. albopictus | Canada      |
| MF185672.1 | Ae. albopictus | Canada      |
| MW279074.1 | Ae. albopictus | Spain       |
| MW279073.1 | Ae. albopictus | Spain       |
| MW279068.1 | Ae. albopictus | Spain       |
| KC690961.1 | Ae. albopictus | USA         |
| KC690955.1 | Ae. albopictus | USA         |
| KC690944.1 | Ae. albopictus | USA         |
| KC690933.1 | Ae. albopictus | USA         |
| KC690932.1 | Ae. albopictus | USA         |

|            |                |        |
|------------|----------------|--------|
| KC690927.1 | Ae. albopictus | USA    |
| KC690925.1 | Ae. albopictus | USA    |
| KC690921.1 | Ae. albopictus | USA    |
| KC690918.1 | Ae. albopictus | USA    |
| KC690917.1 | Ae. albopictus | USA    |
| KC690916.1 | Ae. albopictus | USA    |
| KC690914.1 | Ae. albopictus | USA    |
| KC690910.1 | Ae. albopictus | USA    |
| KC690904.1 | Ae. albopictus | USA    |
| KC690901.1 | Ae. albopictus | USA    |
| KC690898.1 | Ae. albopictus | USA    |
| KC690896.1 | Ae. albopictus | USA    |
| MF185679.1 | Ae. albopictus | USA    |
| MF185670.1 | Ae. albopictus | Canada |
| MF185669.1 | Ae. albopictus | Canada |
| MW279077.1 | Ae. albopictus | Spain  |
| MW279076.1 | Ae. albopictus | Spain  |
| MW279072.1 | Ae. albopictus | Spain  |
| MW279071.1 | Ae. albopictus | Spain  |
| KC690959.1 | Ae. albopictus | USA    |
| KC690958.1 | Ae. albopictus | USA    |
| KC690956.1 | Ae. albopictus | USA    |
| KC690953.1 | Ae. albopictus | USA    |
| KC690952.1 | Ae. albopictus | USA    |
| KC690950.1 | Ae. albopictus | USA    |
| KC690949.1 | Ae. albopictus | USA    |
| KC690947.1 | Ae. albopictus | USA    |
| KC690945.1 | Ae. albopictus | USA    |
| KC690943.1 | Ae. albopictus | USA    |
| KC690936.1 | Ae. albopictus | USA    |
| KC690934.1 | Ae. albopictus | USA    |
| KC690923.1 | Ae. albopictus | USA    |
| KC690920.1 | Ae. albopictus | USA    |
| KC690915.1 | Ae. albopictus | USA    |
| KC690913.1 | Ae. albopictus | USA    |
| KC690911.1 | Ae. albopictus | USA    |
| KC690905.1 | Ae. albopictus | USA    |
| KC690903.1 | Ae. albopictus | USA    |
| KC690900.1 | Ae. albopictus | USA    |
| KC690899.1 | Ae. albopictus | USA    |
| KC690897.1 | Ae. albopictus | USA    |
| MW776430.1 | Ae. albopictus | Russia |
| MH817538.1 | Ae. albopictus | USA    |

|            |                |                                  |
|------------|----------------|----------------------------------|
| MF185678.1 | Ae. albopictus | USA                              |
| MW279075.1 | Ae. albopictus | Spain                            |
| KC690960.1 | Ae. albopictus | USA                              |
| KC690957.1 | Ae. albopictus | USA                              |
| KC690954.1 | Ae. albopictus | USA                              |
| KC690948.1 | Ae. albopictus | USA                              |
| KC690946.1 | Ae. albopictus | USA                              |
| KC690942.1 | Ae. albopictus | USA                              |
| KC690939.1 | Ae. albopictus | USA                              |
| KC690937.1 | Ae. albopictus | USA                              |
| KC690931.1 | Ae. albopictus | USA                              |
| KC690919.1 | Ae. albopictus | USA                              |
| KC690908.1 | Ae. albopictus | USA                              |
| KC690907.1 | Ae. albopictus | USA                              |
| MH817514.1 | Ae. albopictus | Russia                           |
| MH817523.1 | Ae. albopictus | Russia                           |
| MF185674.1 | Ae. albopictus | Canada                           |
| MW279078.1 | Ae. albopictus | France                           |
| KC690938.1 | Ae. albopictus | USA                              |
| KC690926.1 | Ae. albopictus | USA                              |
| KC690909.1 | Ae. albopictus | USA                              |
| KC690902.1 | Ae. albopictus | USA                              |
| MW776429.1 | Ae. albopictus | Russia                           |
| KX383924.1 | Ae. albopictus | Brazil                           |
| KX383924.1 | Ae. albopictus | Brazil                           |
| AB907801.1 | Ae. albopictus | Panama                           |
| AB907796.1 | Ae. albopictus | Costa Rica                       |
| AB907800.1 | Ae. albopictus | Costa Rica                       |
| AB907798.1 | Ae. albopictus | Costa Rica                       |
| AB907797.1 | Ae. albopictus | Costa Rica                       |
| AB907799.1 | Ae. albopictus | Costa Rica                       |
| MH817495.1 | Ae. albopictus | Russia                           |
| MN080743.1 | Ae. albopictus | Lao People's Democratic Republic |
| MN080765.1 | Ae. albopictus | Lao People's Democratic Republic |
| MN080730.1 | Ae. albopictus | Lao People's Democratic Republic |
| MN080729.1 | Ae. albopictus | Lao People's Democratic Republic |
| MH817547.1 | Ae. albopictus | Russia                           |
| MN080763.1 | Ae. albopictus | Lao People's Democratic Republic |
| MN080761.1 | Ae. albopictus | Lao People's Democratic Republic |
| MN080758.1 | Ae. albopictus | Lao People's Democratic Republic |
| MN080745.1 | Ae. albopictus | Lao People's Democratic Republic |
| MN080740.1 | Ae. albopictus | Lao People's Democratic Republic |
| MN080739.1 | Ae. albopictus | Lao People's Democratic Republic |

|            |                |                                  |
|------------|----------------|----------------------------------|
| MN080737.1 | Ae. albopictus | Lao People's Democratic Republic |
| MN080736.1 | Ae. albopictus | Lao People's Democratic Republic |
| MN080735.1 | Ae. albopictus | Lao People's Democratic Republic |
| MN080732.1 | Ae. albopictus | Lao People's Democratic Republic |
| MN080731.1 | Ae. albopictus | Lao People's Democratic Republic |
| MN080728.1 | Ae. albopictus | Lao People's Democratic Republic |
| MN080726.1 | Ae. albopictus | Lao People's Democratic Republic |
| MN080724.1 | Ae. albopictus | Lao People's Democratic Republic |
| MN080723.1 | Ae. albopictus | Lao People's Democratic Republic |
| MN080722.1 | Ae. albopictus | Lao People's Democratic Republic |
| MN080720.1 | Ae. albopictus | Lao People's Democratic Republic |
| MH817548.1 | Ae. albopictus | Russia                           |
| MH817555.1 | Ae. albopictus | Russia                           |
| MN080764.1 | Ae. albopictus | Lao People's Democratic Republic |
| MN080762.1 | Ae. albopictus | Lao People's Democratic Republic |
| MN080760.1 | Ae. albopictus | Lao People's Democratic Republic |
| MN080759.1 | Ae. albopictus | Lao People's Democratic Republic |
| MN080757.1 | Ae. albopictus | Lao People's Democratic Republic |
| MN080756.1 | Ae. albopictus | Lao People's Democratic Republic |
| MN080755.1 | Ae. albopictus | Lao People's Democratic Republic |
| MN080752.1 | Ae. albopictus | Lao People's Democratic Republic |
| MN080751.1 | Ae. albopictus | Lao People's Democratic Republic |
| MN080750.1 | Ae. albopictus | Lao People's Democratic Republic |
| MN080749.1 | Ae. albopictus | Lao People's Democratic Republic |
| MN080748.1 | Ae. albopictus | Lao People's Democratic Republic |
| MN080747.1 | Ae. albopictus | Lao People's Democratic Republic |
| MN080744.1 | Ae. albopictus | Lao People's Democratic Republic |
| MN080742.1 | Ae. albopictus | Lao People's Democratic Republic |
| MN080741.1 | Ae. albopictus | Lao People's Democratic Republic |
| MN080738.1 | Ae. albopictus | Lao People's Democratic Republic |
| MN080734.1 | Ae. albopictus | Lao People's Democratic Republic |
| MN080727.1 | Ae. albopictus | Lao People's Democratic Republic |
| MN080725.1 | Ae. albopictus | Lao People's Democratic Republic |
| MN080721.1 | Ae. albopictus | Lao People's Democratic Republic |
| MH817537.1 | Ae. albopictus | Lao People's Democratic Republic |
| MN080754.1 | Ae. albopictus | Russia                           |
| MN080753.1 | Ae. albopictus | Lao People's Democratic Republic |
| MN080746.1 | Ae. albopictus | Lao People's Democratic Republic |
| LC591863.1 | Ae. albopictus | Thailand                         |
| LC591859.1 | Ae. albopictus | Thailand                         |
| MN080733.1 | Ae. albopictus | Lao People's Democratic Republic |
| LC591942.1 | Ae. albopictus | Japan                            |
| LC591898.1 | Ae. albopictus | Japan                            |

|            |                |          |
|------------|----------------|----------|
| LC591885.1 | Ae. albopictus | Japan    |
| LC591876.1 | Ae. albopictus | Japan    |
| LC591870.1 | Ae. albopictus | Thailand |
| LC591869.1 | Ae. albopictus | Thailand |
| LC591866.1 | Ae. albopictus | Thailand |
| LC591862.1 | Ae. albopictus | Thailand |
| LC591860.1 | Ae. albopictus | Thailand |
| LC591925.1 | Ae. albopictus | Japan    |
| LC591920.1 | Ae. albopictus | Japan    |
| LC591895.1 | Ae. albopictus | Japan    |
| LC591887.1 | Ae. albopictus | Japan    |
| LC591884.1 | Ae. albopictus | Japan    |
| LC591882.1 | Ae. albopictus | Japan    |
| LC591881.1 | Ae. albopictus | Japan    |
| LC591867.1 | Ae. albopictus | Japan    |
| LC591861.1 | Ae. albopictus | Thailand |
| LC597556.1 | Ae. albopictus | Japan    |
| LC597554.1 | Ae. albopictus | Japan    |
| LC597553.1 | Ae. albopictus | Japan    |
| LC597552.1 | Ae. albopictus | Japan    |
| LC597551.1 | Ae. albopictus | Japan    |
| LC597550.1 | Ae. albopictus | Japan    |
| LC591941.1 | Ae. albopictus | Japan    |
| LC591940.1 | Ae. albopictus | Japan    |
| LC591939.1 | Ae. albopictus | Japan    |
| LC591937.1 | Ae. albopictus | Japan    |
| LC591936.1 | Ae. albopictus | Japan    |
| LC591935.1 | Ae. albopictus | Japan    |
| LC591934.1 | Ae. albopictus | Japan    |
| LC591933.1 | Ae. albopictus | Japan    |
| LC591931.1 | Ae. albopictus | Japan    |
| LC591928.1 | Ae. albopictus | Japan    |
| LC591924.1 | Ae. albopictus | Japan    |
| LC591921.1 | Ae. albopictus | Japan    |
| LC591915.1 | Ae. albopictus | Japan    |
| LC591914.1 | Ae. albopictus | Japan    |
| LC591913.1 | Ae. albopictus | Japan    |
| LC591910.1 | Ae. albopictus | Japan    |
| LC591909.1 | Ae. albopictus | Japan    |
| LC591905.1 | Ae. albopictus | Japan    |
| LC591904.1 | Ae. albopictus | Japan    |
| LC591903.1 | Ae. albopictus | Japan    |
| LC591902.1 | Ae. albopictus | Japan    |



|            |                |             |
|------------|----------------|-------------|
| LC591899.1 | Ae. albopictus | Japan       |
| LC591894.1 | Ae. albopictus | Japan       |
| LC591891.1 | Ae. albopictus | Japan       |
| LC591890.1 | Ae. albopictus | Japan       |
| LC591879.1 | Ae. albopictus | Japan       |
| LC591875.1 | Ae. albopictus | Japan       |
| LC591868.1 | Ae. albopictus | Thailand    |
| LC591865.1 | Ae. albopictus | Thailand    |
| LC591864.1 | Ae. albopictus | Thailand    |
| LC591932.1 | Ae. albopictus | Japan       |
| LC591930.1 | Ae. albopictus | Japan       |
| LC591927.1 | Ae. albopictus | Japan       |
| LC591926.1 | Ae. albopictus | Japan       |
| LC591923.1 | Ae. albopictus | Japan       |
| LC591922.1 | Ae. albopictus | Japan       |
| LC591919.1 | Ae. albopictus | Japan       |
| LC591918.1 | Ae. albopictus | Japan       |
| LC591917.1 | Ae. albopictus | Japan       |
| LC591912.1 | Ae. albopictus | Japan       |
| LC591911.1 | Ae. albopictus | Japan       |
| LC591892.1 | Ae. albopictus | Japan       |
| LC591886.1 | Ae. albopictus | Japan       |
| LC591880.1 | Ae. albopictus | Japan       |
| LC591878.1 | Ae. albopictus | Japan       |
| LC591877.1 | Ae. albopictus | Japan       |
| MF148271.1 | Ae. albopictus | Malaysia    |
| LC597555.1 | Ae. albopictus | Japan       |
| LC597549.1 | Ae. albopictus | Japan       |
| LC591938.1 | Ae. albopictus | Japan       |
| LC591929.1 | Ae. albopictus | Japan       |
| LC591916.1 | Ae. albopictus | Japan       |
| LC591908.1 | Ae. albopictus | Japan       |
| LC591907.1 | Ae. albopictus | Japan       |
| LC591906.1 | Ae. albopictus | Japan       |
| LC591901.1 | Ae. albopictus | Japan       |
| LC591900.1 | Ae. albopictus | Japan       |
| LC591897.1 | Ae. albopictus | Japan       |
| LC591896.1 | Ae. albopictus | Japan       |
| LC591893.1 | Ae. albopictus | Japan       |
| LC591889.1 | Ae. albopictus | Japan       |
| LC591888.1 | Ae. albopictus | Japan       |
| LC591883.1 | Ae. albopictus | Japan       |
| LC591872.1 | Ae. albopictus | Philippines |

|            |                |             |
|------------|----------------|-------------|
| LC591871.1 | Ae. albopictus | Philippines |
| LC591874.1 | Ae. albopictus | Philippines |
| MH817521.1 | Ae. albopictus | Russia      |
| LC591873.1 | Ae. albopictus | Philippines |
| MZ501561.1 | Ae. albopictus | Russia      |
| MZ501560.1 | Ae. albopictus | Russia      |
| MZ501555.1 | Ae. albopictus | Russia      |
| MZ501554.1 | Ae. albopictus | Russia      |
| MZ501552.1 | Ae. albopictus | Russia      |
| MZ501540.1 | Ae. albopictus | Russia      |
| MZ501537.1 | Ae. albopictus | Russia      |
| MZ501518.1 | Ae. albopictus | Russia      |
| MZ501517.1 | Ae. albopictus | Russia      |
| MZ501516.1 | Ae. albopictus | Russia      |
| MZ501510.1 | Ae. albopictus | Russia      |
| MZ501508.1 | Ae. albopictus | Russia      |
| MH817556.1 | Ae. albopictus | Russia      |
| MZ501559.1 | Ae. albopictus | Russia      |
| MZ501558.1 | Ae. albopictus | Russia      |
| MZ501557.1 | Ae. albopictus | Russia      |
| MZ501556.1 | Ae. albopictus | Russia      |
| MZ501553.1 | Ae. albopictus | Russia      |
| MZ501551.1 | Ae. albopictus | Russia      |
| MZ501550.1 | Ae. albopictus | Russia      |
| MZ501549.1 | Ae. albopictus | Russia      |
| MZ501548.1 | Ae. albopictus | Russia      |
| MZ501547.1 | Ae. albopictus | Russia      |
| MZ501546.1 | Ae. albopictus | Russia      |
| MZ501545.1 | Ae. albopictus | Russia      |
| MZ501544.1 | Ae. albopictus | Russia      |
| MZ501543.1 | Ae. albopictus | Russia      |
| MZ501542.1 | Ae. albopictus | Russia      |
| MZ501541.1 | Ae. albopictus | Russia      |
| MZ501539.1 | Ae. albopictus | Russia      |
| MZ501538.1 | Ae. albopictus | Russia      |
| MZ501536.1 | Ae. albopictus | Russia      |
| MZ501535.1 | Ae. albopictus | Russia      |
| MZ501534.1 | Ae. albopictus | Russia      |
| MZ501533.1 | Ae. albopictus | Russia      |
| MZ501532.1 | Ae. albopictus | Russia      |
| MZ501531.1 | Ae. albopictus | Russia      |
| MZ501530.1 | Ae. albopictus | Russia      |
| MZ501529.1 | Ae. albopictus | Russia      |

|            |                |          |
|------------|----------------|----------|
| MZ501528.1 | Ae. albopictus | Russia   |
| MZ501527.1 | Ae. albopictus | Russia   |
| MZ501526.1 | Ae. albopictus | Russia   |
| MZ501525.1 | Ae. albopictus | Russia   |
| MZ501524.1 | Ae. albopictus | Russia   |
| MZ501523.1 | Ae. albopictus | Russia   |
| MZ501522.1 | Ae. albopictus | Russia   |
| MZ501521.1 | Ae. albopictus | Russia   |
| MZ501520.1 | Ae. albopictus | Russia   |
| MZ501519.1 | Ae. albopictus | Russia   |
| MZ501515.1 | Ae. albopictus | Russia   |
| MZ501514.1 | Ae. albopictus | Russia   |
| MZ501513.1 | Ae. albopictus | Russia   |
| MZ501512.1 | Ae. albopictus | Russia   |
| MZ501511.1 | Ae. albopictus | Russia   |
| MZ501509.1 | Ae. albopictus | Russia   |
| MZ501507.1 | Ae. albopictus | Russia   |
| MZ501506.1 | Ae. albopictus | Russia   |
| MZ501505.1 | Ae. albopictus | Russia   |
| MZ501503.1 | Ae. albopictus | Russia   |
| MZ501502.1 | Ae. albopictus | Russia   |
| MZ501501.1 | Ae. albopictus | Russia   |
| MZ501500.1 | Ae. albopictus | Russia   |
| MT711529.1 | Ae. albopictus | Russia   |
| MZ501504.1 | Ae. albopictus | Russia   |
| KY982346.1 | Ae. albopictus | Malaysia |
| MW283013.1 | Ae. albopictus | Nigeria  |
| KY982343.1 | Ae. albopictus | Malaysia |
| KY982348.1 | Ae. albopictus | Malaysia |
| MN513360.1 | Ae. albopictus | Portugal |
| KY982361.1 | Ae. albopictus | Malaysia |
| MF148272.1 | Ae. albopictus | Malaysia |
| MF148262.1 | Ae. albopictus | Malaysia |
| MF148269.1 | Ae. albopictus | Malaysia |
| MF148257.1 | Ae. albopictus | Malaysia |
| KY982344.1 | Ae. albopictus | Malaysia |
| KY982351.1 | Ae. albopictus | Malaysia |
| MF148266.1 | Ae. albopictus | Malaysia |
| KY982345.1 | Ae. albopictus | Malaysia |
| KY982349.1 | Ae. albopictus | Malaysia |
| KY982347.1 | Ae. albopictus | Malaysia |
| MT711530.1 | Ae. albopictus | Russia   |
| KY982352.1 | Ae. albopictus | Malaysia |

|            |                |             |
|------------|----------------|-------------|
| KY982365.1 | Ae. albopictus | Malaysia    |
| KY982363.1 | Ae. albopictus | Malaysia    |
| DQ181458.1 | Ae. albopictus | Puerto Rico |
| KY982350.1 | Ae. albopictus | Malaysia    |
| DQ181457.1 | Ae. albopictus | Puerto Rico |
| DQ181451.1 | Ae. albopictus | Puerto Rico |
| DQ397912.1 | Ae. albopictus | Japan       |
| DQ397911.1 | Ae. albopictus | Japan       |
| DQ397910.1 | Ae. albopictus | Japan       |
| DQ397909.1 | Ae. albopictus | Indonesia   |
| DQ397908.1 | Ae. albopictus | Indonesia   |
| MT755928.1 | Ae. albopictus | China       |
| MT755927.1 | Ae. albopictus | China       |
| MT188124.2 | Ae. albopictus | China       |
| MT188118.2 | Ae. albopictus | China       |
| MT188115.2 | Ae. albopictus | China       |
| AF253022.1 | Ae. albopictus | Italy       |
| MT755929.1 | Ae. albopictus | China       |
| MT755925.1 | Ae. albopictus | China       |
| MT755924.1 | Ae. albopictus | China       |
| MT755921.1 | Ae. albopictus | China       |
| MT755918.1 | Ae. albopictus | China       |
| MT188116.2 | Ae. albopictus | China       |
| MT188114.2 | Ae. albopictus | China       |
| MT188111.2 | Ae. albopictus | China       |
| GQ143719.1 | Ae. albopictus | Australia   |
| MT755926.1 | Ae. albopictus | China       |
| MT755923.1 | Ae. albopictus | China       |
| MT755922.1 | Ae. albopictus | China       |
| MT755920.1 | Ae. albopictus | China       |
| MT755919.1 | Ae. albopictus | China       |
| MT188129.2 | Ae. albopictus | China       |
| MT188128.2 | Ae. albopictus | China       |
| MT188127.2 | Ae. albopictus | China       |
| MT188125.2 | Ae. albopictus | China       |
| MT188123.2 | Ae. albopictus | China       |
| MT188121.2 | Ae. albopictus | China       |
| MT188120.2 | Ae. albopictus | China       |
| MT188119.2 | Ae. albopictus | China       |
| MT188117.2 | Ae. albopictus | China       |
| MT188113.2 | Ae. albopictus | China       |
| MT188112.2 | Ae. albopictus | China       |
| MT188130.2 | Ae. albopictus | China       |

|            |                |           |
|------------|----------------|-----------|
| MT188126.2 | Ae. albopictus | China     |
| MT188122.2 | Ae. albopictus | China     |
| KU495082.1 | Ae. albopictus | Australia |
| KP896551.1 | Ae. albopictus | Malaysia  |
| KP896575.1 | Ae. albopictus | Malaysia  |
| KP896569.1 | Ae. albopictus | Malaysia  |
| KP896567.1 | Ae. albopictus | Malaysia  |
| KP896559.1 | Ae. albopictus | Malaysia  |
| KP896553.1 | Ae. albopictus | Malaysia  |
| KP896552.1 | Ae. albopictus | Malaysia  |
| KP896550.1 | Ae. albopictus | Malaysia  |
| KP896574.1 | Ae. albopictus | Malaysia  |
| KP896562.1 | Ae. albopictus | Malaysia  |
| KP896558.1 | Ae. albopictus | Malaysia  |
| KP896557.1 | Ae. albopictus | Malaysia  |
| KP896556.1 | Ae. albopictus | Malaysia  |
| KP896555.1 | Ae. albopictus | Malaysia  |
| KP896563.1 | Ae. albopictus | Malaysia  |
| KP896561.1 | Ae. albopictus | Malaysia  |
| MN175498.1 | Ae. albopictus | Argentina |
| KP896565.1 | Ae. albopictus | Malaysia  |
| KP877568.1 | Ae. albopictus | Colombia  |
| KP877564.1 | Ae. albopictus | Colombia  |
| KP896570.1 | Ae. albopictus | Malaysia  |
| KP877563.1 | Ae. albopictus | Colombia  |
| KP877571.1 | Ae. albopictus | Colombia  |
| KP877566.1 | Ae. albopictus | Colombia  |
| JQ436996.1 | Ae. albopictus | Viet Nam  |
| JQ437007.1 | Ae. albopictus | Thailand  |
| JQ437001.1 | Ae. albopictus | Bhutan    |
| JQ436998.1 | Ae. albopictus | Bhutan    |
| JQ436997.1 | Ae. albopictus | Viet Nam  |
| JQ436988.1 | Ae. albopictus | China     |
| JQ436984.1 | Ae. albopictus | Japan     |
| JQ437006.1 | Ae. albopictus | Thailand  |
| JQ437005.1 | Ae. albopictus | Thailand  |
| JQ437004.1 | Ae. albopictus | Thailand  |
| JQ437003.1 | Ae. albopictus | Thailand  |
| JQ437002.1 | Ae. albopictus | Bhutan    |
| JQ437000.1 | Ae. albopictus | Bhutan    |
| JQ436999.1 | Ae. albopictus | Bhutan    |
| JQ436995.1 | Ae. albopictus | Viet Nam  |
| JQ436991.1 | Ae. albopictus | China     |

|            |                |             |
|------------|----------------|-------------|
| JQ436990.1 | Ae. albopictus | China       |
| JQ436989.1 | Ae. albopictus | China       |
| JQ436987.1 | Ae. albopictus | Japan       |
| JQ436985.1 | Ae. albopictus | Japan       |
| JQ436982.1 | Ae. albopictus | Japan       |
| JQ436981.1 | Ae. albopictus | Japan       |
| MK372914.1 | Ae. albopictus | USA         |
| JQ437008.1 | Ae. albopictus | Thailand    |
| JQ436994.1 | Ae. albopictus | Viet Nam    |
| JQ436993.1 | Ae. albopictus | Viet Nam    |
| JQ436992.1 | Ae. albopictus | Viet Nam    |
| JQ436986.1 | Ae. albopictus | Japan       |
| JQ436983.1 | Ae. albopictus | Japan       |
| KX266669.1 | Ae. albopictus | China       |
| KJ410335.1 | Ae. albopictus | India       |
| JQ388786.1 | Ae. albopictus | Germany     |
| MW829500.1 | Ae. albopictus | South Korea |
| KX266726.1 | Ae. albopictus | China       |
| KX266694.1 | Ae. albopictus | China       |
| KX266693.1 | Ae. albopictus | China       |
| MK714009.1 | Ae. albopictus | Turkey      |
| MK714008.1 | Ae. albopictus | Turkey      |
| MK714006.1 | Ae. albopictus | Turkey      |
| MK713991.1 | Ae. albopictus | Turkey      |
| KX266725.1 | Ae. albopictus | China       |
| KX266723.1 | Ae. albopictus | China       |
| KX266720.1 | Ae. albopictus | China       |
| KX266714.1 | Ae. albopictus | China       |
| KX266709.1 | Ae. albopictus | China       |
| KX266677.1 | Ae. albopictus | China       |
| KX266665.1 | Ae. albopictus | China       |
| KX266653.1 | Ae. albopictus | China       |
| KX266649.1 | Ae. albopictus | China       |
| KX266647.1 | Ae. albopictus | China       |
| KX266643.1 | Ae. albopictus | China       |
| KX266642.1 | Ae. albopictus | China       |
| KX266639.1 | Ae. albopictus | China       |
| KX266638.1 | Ae. albopictus | China       |
| KF564663.1 | Ae. albopictus | Singapore   |
| KF564662.1 | Ae. albopictus | Singapore   |
| MW542315.1 | Ae. albopictus | India       |
| KX266719.1 | Ae. albopictus | China       |
| MW940859.1 | Ae. albopictus | China       |

|            |                |           |
|------------|----------------|-----------|
| MT890465.1 | Ae. albopictus | China     |
| KX266660.1 | Ae. albopictus | China     |
| KX266658.1 | Ae. albopictus | China     |
| MZ007511.1 | Ae. albopictus | China     |
| MT906350.1 | Ae. albopictus | China     |
| MK714010.1 | Ae. albopictus | Turkey    |
| MK372913.1 | Ae. albopictus | USA       |
| KX266721.1 | Ae. albopictus | China     |
| KX266718.1 | Ae. albopictus | China     |
| KX266717.1 | Ae. albopictus | China     |
| KX266690.1 | Ae. albopictus | China     |
| KX266679.1 | Ae. albopictus | China     |
| KX266675.1 | Ae. albopictus | China     |
| KX266656.1 | Ae. albopictus | China     |
| KX266646.1 | Ae. albopictus | China     |
| KX266641.1 | Ae. albopictus | China     |
| KF564664.1 | Ae. albopictus | Singapore |
| KJ410333.1 | Ae. albopictus | India     |
| MW940866.1 | Ae. albopictus | China     |
| JX679374.1 | Ae. albopictus | Italy     |
| MT890489.1 | Ae. albopictus | China     |
| MK542378.1 | Ae. albopictus | India     |
| KX266710.1 | Ae. albopictus | China     |
| KX266645.1 | Ae. albopictus | China     |
| OK266909.1 | Ae. albopictus | Ecuador   |
| MZ007515.1 | Ae. albopictus | China     |
| MZ007513.1 | Ae. albopictus | China     |
| MZ007512.1 | Ae. albopictus | China     |
| MW940871.1 | Ae. albopictus | China     |
| MT906351.1 | Ae. albopictus | China     |
| MT906352.1 | Ae. albopictus | China     |
| KY817524.1 | Ae. albopictus | Malaysia  |
| KX266670.1 | Ae. albopictus | China     |
| KX266666.1 | Ae. albopictus | China     |
| KX266664.1 | Ae. albopictus | China     |
| KX266640.1 | Ae. albopictus | China     |
| OK266901.1 | Ae. albopictus | Ecuador   |
| MT906353.1 | Ae. albopictus | China     |
| MT906156.1 | Ae. albopictus | China     |
| MT890464.1 | Ae. albopictus | China     |
| MG242466.1 | Ae. albopictus | USA       |
| KX266697.1 | Ae. albopictus | China     |
| KX266672.1 | Ae. albopictus | China     |

|            |                |           |
|------------|----------------|-----------|
| OK266908.1 | Ae. albopictus | Ecuador   |
| MZ007514.1 | Ae. albopictus | China     |
| JX679377.1 | Ae. albopictus | Italy     |
| JX679373.1 | Ae. albopictus | Italy     |
| KX266667.1 | Ae. albopictus | China     |
| MW321941.1 | Ae. albopictus | Singapore |
| KX266712.1 | Ae. albopictus | China     |
| OK266912.1 | Ae. albopictus | Ecuador   |
| OK266899.1 | Ae. albopictus | Ecuador   |
| MW321942.1 | Ae. albopictus | Singapore |
| MK297326.1 | Ae. albopictus | India     |
| KX266685.1 | Ae. albopictus | China     |
| KX266680.1 | Ae. albopictus | China     |
| KX266671.1 | Ae. albopictus | China     |
| KX266668.1 | Ae. albopictus | China     |
| MW457633.1 | Ae. albopictus | Austria   |
| KX266700.1 | Ae. albopictus | China     |
| OK266904.1 | Ae. albopictus | Ecuador   |
| JQ235749.1 | Ae. albopictus | China     |
| KX266682.1 | Ae. albopictus | China     |
| OK266944.1 | Ae. albopictus | Ecuador   |
| OK266925.1 | Ae. albopictus | Ecuador   |
| OK266914.1 | Ae. albopictus | Ecuador   |
| OK266910.1 | Ae. albopictus | Ecuador   |
| KX266678.1 | Ae. albopictus | China     |
| OK266947.1 | Ae. albopictus | Ecuador   |
| OK266945.1 | Ae. albopictus | Ecuador   |
| OK266931.1 | Ae. albopictus | Ecuador   |
| OK266930.1 | Ae. albopictus | Ecuador   |
| OK266927.1 | Ae. albopictus | Ecuador   |
| OK266926.1 | Ae. albopictus | Ecuador   |
| OK266921.1 | Ae. albopictus | Ecuador   |
| OK266917.1 | Ae. albopictus | Ecuador   |
| OK266915.1 | Ae. albopictus | Ecuador   |
| OK266913.1 | Ae. albopictus | Ecuador   |
| OK266907.1 | Ae. albopictus | Ecuador   |
| OK266905.1 | Ae. albopictus | Ecuador   |
| OK266900.1 | Ae. albopictus | Ecuador   |
| MW321940.1 | Ae. albopictus | Singapore |
| MK182262.1 | Ae. albopictus | Pakistan  |
| MN103394.1 | Ae. albopictus | Austria   |
| KX266708.1 | Ae. albopictus | China     |
| OK266948.1 | Ae. albopictus | Ecuador   |



|            |                |                                  |
|------------|----------------|----------------------------------|
| OK266943.1 | Ae. albopictus | Ecuador                          |
| OK266939.1 | Ae. albopictus | Ecuador                          |
| OK266938.1 | Ae. albopictus | Ecuador                          |
| OK266923.1 | Ae. albopictus | Ecuador                          |
| OK266916.1 | Ae. albopictus | Ecuador                          |
| OK266911.1 | Ae. albopictus | Ecuador                          |
| OK266903.1 | Ae. albopictus | Ecuador                          |
| MN299017.1 | Ae. albopictus | Democratic Republic of the Congo |
| OK266932.1 | Ae. albopictus | Ecuador                          |
| OK266929.1 | Ae. albopictus | Ecuador                          |
| OK266928.1 | Ae. albopictus | Ecuador                          |
| OK266920.1 | Ae. albopictus | Ecuador                          |
| OK266919.1 | Ae. albopictus | Ecuador                          |
| OK266918.1 | Ae. albopictus | Ecuador                          |
| OK266906.1 | Ae. albopictus | Ecuador                          |
| OK266902.1 | Ae. albopictus | Ecuador                          |
| MN103393.1 | Ae. albopictus | Austria                          |
| KX266722.1 | Ae. albopictus | China                            |
| KX266706.1 | Ae. albopictus | China                            |
| OK266935.1 | Ae. albopictus | Ecuador                          |
| OK266933.1 | Ae. albopictus | Ecuador                          |
| MN997608.1 | Ae. albopictus | Colombia                         |
| OK266946.1 | Ae. albopictus | Ecuador                          |
| OK266941.1 | Ae. albopictus | Ecuador                          |
| OK266936.1 | Ae. albopictus | Ecuador                          |
| MT345358.1 | Ae. albopictus | Democratic Republic of the Congo |
| MN299019.1 | Ae. albopictus | USA                              |
| MK995332.1 | Ae. albopictus | Portugal                         |
| OK266940.1 | Ae. albopictus | Ecuador                          |
| OK266937.1 | Ae. albopictus | Ecuador                          |
| OK266934.1 | Ae. albopictus | Ecuador                          |
| OK266922.1 | Ae. albopictus | Ecuador                          |
| KX266657.1 | Ae. albopictus | China                            |
| OK266949.1 | Ae. albopictus | Ecuador                          |
| MT345357.1 | Ae. albopictus | Democratic Republic of the Congo |
| MZ573312.1 | Ae. albopictus | Viet Nam                         |
| MT345356.1 | Ae. albopictus | Democratic Republic of the Congo |
| MT345355.1 | Ae. albopictus | Democratic Republic of the Congo |
| MT345354.1 | Ae. albopictus | Democratic Republic of the Congo |
| MT345353.1 | Ae. albopictus | Democratic Republic of the Congo |
| MT345352.1 | Ae. albopictus | Democratic Republic of the Congo |
| MT345351.1 | Ae. albopictus | Democratic Republic of the Congo |
| HQ398900.1 | Ae. albopictus | Viet Nam                         |

|            |                |           |
|------------|----------------|-----------|
| MF990905.1 | Ae. albopictus | Portugal  |
| MZ573373.1 | Ae. albopictus | Viet Nam  |
| MH330191.1 | Ae. albopictus | Sri Lanka |
| DQ424959.1 | Ae. albopictus | India     |
| KX266724.1 | Ae. albopictus | China     |
| KX266699.1 | Ae. albopictus | China     |
| KX266662.1 | Ae. albopictus | China     |
| KF406415.1 | Ae. albopictus | Pakistan  |
| MN997607.1 | Ae. albopictus | Colombia  |
| MN997606.1 | Ae. albopictus | Colombia  |
| MN005056.1 | Ae. albopictus | Greece    |
| MN005055.1 | Ae. albopictus | Greece    |
| MN005054.1 | Ae. albopictus | Greece    |
| MG921178.1 | Ae. albopictus | Laos      |
| KP843396.1 | Ae. albopictus | Thailand  |
| MT999327.1 | Ae. albopictus | Mexico    |
| MT999274.1 | Ae. albopictus | Mexico    |
| MT999263.1 | Ae. albopictus | Mexico    |
| MT999219.1 | Ae. albopictus | Mexico    |
| OK465207.1 | Ae. albopictus | China     |
| OK465206.1 | Ae. albopictus | China     |
| OK465205.1 | Ae. albopictus | China     |
| MZ573375.1 | Ae. albopictus | Viet Nam  |
| MZ573374.1 | Ae. albopictus | Viet Nam  |
| MZ573370.1 | Ae. albopictus | Viet Nam  |
| MZ573368.1 | Ae. albopictus | Viet Nam  |
| MZ573367.1 | Ae. albopictus | Viet Nam  |
| MZ573363.1 | Ae. albopictus | Viet Nam  |
| MZ573361.1 | Ae. albopictus | Viet Nam  |
| MZ573357.1 | Ae. albopictus | Viet Nam  |
| MZ573356.1 | Ae. albopictus | Viet Nam  |
| MZ573354.1 | Ae. albopictus | Viet Nam  |
| MZ573353.1 | Ae. albopictus | Viet Nam  |
| MZ573351.1 | Ae. albopictus | Viet Nam  |
| MZ573343.1 | Ae. albopictus | Viet Nam  |
| MZ573324.1 | Ae. albopictus | Viet Nam  |
| MZ573323.1 | Ae. albopictus | Viet Nam  |
| MZ573319.1 | Ae. albopictus | Viet Nam  |
| MZ573318.1 | Ae. albopictus | Viet Nam  |
| MZ573317.1 | Ae. albopictus | Viet Nam  |
| MZ573316.1 | Ae. albopictus | Viet Nam  |
| MZ573315.1 | Ae. albopictus | Viet Nam  |
| MZ573314.1 | Ae. albopictus | Viet Nam  |

|            |                |                                  |
|------------|----------------|----------------------------------|
| MT552542.1 | Ae. albopictus | Mexico                           |
| MT552470.1 | Ae. albopictus | Mexico                           |
| MW961317.1 | Ae. albopictus | Portugal                         |
| MW961316.1 | Ae. albopictus | Portugal                         |
| MW961315.1 | Ae. albopictus | Portugal                         |
| MZ230340.1 | Ae. albopictus | Viet Nam                         |
| MZ230339.1 | Ae. albopictus | Viet Nam                         |
| MZ230338.1 | Ae. albopictus | Viet Nam                         |
| MZ230337.1 | Ae. albopictus | Russia                           |
| MK505606.1 | Ae. albopictus | Montenegro                       |
| MK505602.1 | Ae. albopictus | Malaysia                         |
| MK505594.1 | Ae. albopictus | Montenegro                       |
| MK505592.1 | Ae. albopictus | Montenegro                       |
| MK505589.1 | Ae. albopictus | Montenegro                       |
| MK505583.1 | Ae. albopictus | Montenegro                       |
| MK505580.1 | Ae. albopictus | Montenegro                       |
| MK505573.1 | Ae. albopictus | Malaysia                         |
| MK505570.1 | Ae. albopictus | Montenegro                       |
| MT345384.1 | Ae. albopictus | Democratic Republic of the Congo |
| MT345383.1 | Ae. albopictus | Democratic Republic of the Congo |
| MT345382.1 | Ae. albopictus | Democratic Republic of the Congo |
| MT345381.1 | Ae. albopictus | Democratic Republic of the Congo |
| MT345380.1 | Ae. albopictus | Democratic Republic of the Congo |
| MT345379.1 | Ae. albopictus | Democratic Republic of the Congo |
| MT345378.1 | Ae. albopictus | Democratic Republic of the Congo |
| MT345377.1 | Ae. albopictus | Democratic Republic of the Congo |
| MT345376.1 | Ae. albopictus | Democratic Republic of the Congo |
| MT345375.1 | Ae. albopictus | Democratic Republic of the Congo |
| MT345374.1 | Ae. albopictus | Democratic Republic of the Congo |
| MT345373.1 | Ae. albopictus | Democratic Republic of the Congo |
| MT345372.1 | Ae. albopictus | Democratic Republic of the Congo |
| MT345371.1 | Ae. albopictus | Democratic Republic of the Congo |
| MT345370.1 | Ae. albopictus | Democratic Republic of the Congo |
| MT345369.1 | Ae. albopictus | Democratic Republic of the Congo |
| MT345368.1 | Ae. albopictus | Democratic Republic of the Congo |
| MT345367.1 | Ae. albopictus | Democratic Republic of the Congo |
| AB690835.1 | Ae. albopictus | Japan                            |
| MK995331.1 | Ae. albopictus | Portugal                         |
| MK995326.1 | Ae. albopictus | Portugal                         |
| MK995319.1 | Ae. albopictus | Portugal                         |
| MG572237.1 | Ae. albopictus | Bangladesh                       |
| KX266663.1 | Ae. albopictus | China                            |
| MZ573322.1 | Ae. albopictus | Viet Nam                         |

|            |                |                                  |
|------------|----------------|----------------------------------|
| MH330190.1 | Ae. albopictus | Sri Lanka                        |
| MK736660.1 | Ae. albopictus | India                            |
| KX266689.1 | Ae. albopictus | China                            |
| KX266688.1 | Ae. albopictus | China                            |
| KM457533.1 | Ae. albopictus | China                            |
| MT345363.1 | Ae. albopictus | Democratic Republic of the Congo |
| MT345362.1 | Ae. albopictus | Democratic Republic of the Congo |
| MT345361.1 | Ae. albopictus | Democratic Republic of the Congo |
| MT345350.1 | Ae. albopictus | Democratic Republic of the Congo |
| KU319450.1 | Ae. albopictus | Spain                            |
| KU319448.1 | Ae. albopictus | Spain                            |
| KU319447.1 | Ae. albopictus | Spain                            |
| KU319444.1 | Ae. albopictus | Spain                            |
| KY825745.1 | Ae. albopictus | China                            |
| KR349286.1 | Ae. albopictus | China                            |
| KR349284.1 | Ae. albopictus | China                            |
| KT358457.1 | Ae. albopictus | South Korea                      |
| KM457544.1 | Ae. albopictus | The Netherlands                  |
| KM457542.1 | Ae. albopictus | The Netherlands                  |
| KM457529.1 | Ae. albopictus | The Netherlands                  |
| MT999330.1 | Ae. albopictus | Mexico                           |
| MT999164.1 | Ae. albopictus | Mexico                           |
| MZ573376.1 | Ae. albopictus | Viet Nam                         |
| MZ573372.1 | Ae. albopictus | Viet Nam                         |
| MZ573371.1 | Ae. albopictus | Viet Nam                         |
| MZ573366.1 | Ae. albopictus | Viet Nam                         |
| MZ573365.1 | Ae. albopictus | Viet Nam                         |
| MZ573364.1 | Ae. albopictus | Viet Nam                         |
| MZ573362.1 | Ae. albopictus | Viet Nam                         |
| MZ573359.1 | Ae. albopictus | Viet Nam                         |
| MZ573352.1 | Ae. albopictus | Viet Nam                         |
| MZ573350.1 | Ae. albopictus | Viet Nam                         |
| MZ573349.1 | Ae. albopictus | Viet Nam                         |
| MZ573345.1 | Ae. albopictus | Viet Nam                         |
| MZ573344.1 | Ae. albopictus | Viet Nam                         |
| MZ573341.1 | Ae. albopictus | Viet Nam                         |
| MZ573340.1 | Ae. albopictus | Viet Nam                         |
| MZ573339.1 | Ae. albopictus | Viet Nam                         |
| MZ573338.1 | Ae. albopictus | Viet Nam                         |
| MZ573336.1 | Ae. albopictus | Viet Nam                         |
| MZ573335.1 | Ae. albopictus | Viet Nam                         |
| MZ573334.1 | Ae. albopictus | Viet Nam                         |
| MZ573327.1 | Ae. albopictus | Viet Nam                         |

|            |                |                                  |
|------------|----------------|----------------------------------|
| MZ573326.1 | Ae. albopictus | Viet Nam                         |
| MZ573325.1 | Ae. albopictus | Viet Nam                         |
| MZ573320.1 | Ae. albopictus | Viet Nam                         |
| MT552522.1 | Ae. albopictus | Mexico                           |
| MT552484.1 | Ae. albopictus | Viet Nam                         |
| MT552393.1 | Ae. albopictus | Viet Nam                         |
| MZ230336.1 | Ae. albopictus | Ukraine                          |
| MK505609.1 | Ae. albopictus | Mexico                           |
| MK505575.1 | Ae. albopictus | Montenegro                       |
| AB738197.1 | Ae. albopictus | Japan                            |
| AB738161.1 | Ae. albopictus | Japan                            |
| AB738090.1 | Ae. albopictus | Japan                            |
| HQ398901.1 | Ae. albopictus | Viet Nam                         |
| MK284525.1 | Ae. albopictus | India                            |
| KX886304.1 | Ae. albopictus | China                            |
| KM457549.1 | Ae. albopictus | The Netherlands                  |
| MH330193.1 | Ae. albopictus | Sri Lanka                        |
| MH330192.1 | Ae. albopictus | Sri Lanka                        |
| MH330189.1 | Ae. albopictus | Sri Lanka                        |
| MT345386.1 | Ae. albopictus | Democratic Republic of the Congo |
| MT345366.1 | Ae. albopictus | Democratic Republic of the Congo |
| MT345365.1 | Ae. albopictus | Democratic Republic of the Congo |
| MT345364.1 | Ae. albopictus | Democratic Republic of the Congo |
| MT345359.1 | Ae. albopictus | Democratic Republic of the Congo |
| KX886338.1 | Ae. albopictus | Democratic Republic of the Congo |
| KU319449.1 | Ae. albopictus | Spain                            |
| KM497420.1 | Ae. albopictus | China                            |
| KM457548.1 | Ae. albopictus | The Netherlands                  |
| KF406512.1 | Ae. albopictus | Pakistan                         |
| KF406478.1 | Ae. albopictus | Pakistan                         |
| KF406398.1 | Ae. albopictus | Pakistan                         |
| MZ573369.1 | Ae. albopictus | Viet Nam                         |
| MZ573360.1 | Ae. albopictus | Viet Nam                         |
| MZ573358.1 | Ae. albopictus | Viet Nam                         |
| MZ573342.1 | Ae. albopictus | Viet Nam                         |
| MZ573337.1 | Ae. albopictus | Viet Nam                         |
| MZ573333.1 | Ae. albopictus | Viet Nam                         |
| MZ573332.1 | Ae. albopictus | Viet Nam                         |
| MZ573331.1 | Ae. albopictus | Viet Nam                         |
| MZ573330.1 | Ae. albopictus | Viet Nam                         |
| MZ573329.1 | Ae. albopictus | Viet Nam                         |
| MZ573328.1 | Ae. albopictus | Viet Nam                         |
| MZ573321.1 | Ae. albopictus | Viet Nam                         |

|            |                |                                  |
|------------|----------------|----------------------------------|
| MZ573313.1 | Ae. albopictus | Viet Nam                         |
| MW228485.1 | Ae. albopictus | China                            |
| KY765473.1 | Ae. albopictus | China                            |
| KX886337.1 | Ae. albopictus | China                            |
| KX886336.1 | Ae. albopictus | China                            |
| KX886334.1 | Ae. albopictus | China                            |
| KX886331.1 | Ae. albopictus | China                            |
| KX886320.1 | Ae. albopictus | China                            |
| KX886317.1 | Ae. albopictus | China                            |
| KX886314.1 | Ae. albopictus | China                            |
| KX886312.1 | Ae. albopictus | China                            |
| KX886311.1 | Ae. albopictus | China                            |
| KX886310.1 | Ae. albopictus | China                            |
| KX886307.1 | Ae. albopictus | China                            |
| KX886306.1 | Ae. albopictus | China                            |
| KX886305.1 | Ae. albopictus | China                            |
| KX886284.1 | Ae. albopictus | China                            |
| KR817732.1 | Ae. albopictus | India                            |
| KF406435.1 | Ae. albopictus | Pakistan                         |
| OK266942.1 | Ae. albopictus | Ecuador                          |
| OK266924.1 | Ae. albopictus | Ecuador                          |
| MK505590.1 | Ae. albopictus | Malaysia                         |
| MN299018.1 | Ae. albopictus | Democratic Republic of the Congo |
| MH578169.1 | Ae. albopictus | China                            |
| OM131686.1 | Ae. albopictus | Japan                            |
| OM131682.1 | Ae. albopictus | Japan                            |
| OM131681.1 | Ae. albopictus | Japan                            |
| KF406545.1 | Ae. albopictus | Pakistan                         |
| KF406491.1 | Ae. albopictus | Pakistan                         |
| OK465352.1 | Ae. albopictus | China                            |
| OK465337.1 | Ae. albopictus | China                            |
| OK465334.1 | Ae. albopictus | China                            |
| OK465331.1 | Ae. albopictus | China                            |
| OK465330.1 | Ae. albopictus | China                            |
| OK465323.1 | Ae. albopictus | China                            |
| OK465322.1 | Ae. albopictus | China                            |
| OK465321.1 | Ae. albopictus | China                            |
| OK465312.1 | Ae. albopictus | China                            |
| OK465310.1 | Ae. albopictus | China                            |
| OK465309.1 | Ae. albopictus | China                            |
| OK465308.1 | Ae. albopictus | China                            |
| OK465297.1 | Ae. albopictus | China                            |
| OK465296.1 | Ae. albopictus | China                            |

|            |                |                |
|------------|----------------|----------------|
| OK465289.1 | Ae. albopictus | China          |
| OK465288.1 | Ae. albopictus | China          |
| OK465281.1 | Ae. albopictus | China          |
| OK465280.1 | Ae. albopictus | China          |
| OK465279.1 | Ae. albopictus | China          |
| OK465268.1 | Ae. albopictus | China          |
| OK465267.1 | Ae. albopictus | China          |
| OK465262.1 | Ae. albopictus | China          |
| OK465254.1 | Ae. albopictus | China          |
| MW228484.1 | Ae. albopictus | China          |
| KF406540.1 | Ae. albopictus | Pakistan       |
| KF406523.1 | Ae. albopictus | Pakistan       |
| KF406495.1 | Ae. albopictus | Pakistan       |
| KF406472.1 | Ae. albopictus | Pakistan       |
| KF406445.1 | Ae. albopictus | Pakistan       |
| KF406407.1 | Ae. albopictus | Pakistan       |
| KF406404.1 | Ae. albopictus | Pakistan       |
| KC970275.1 | Ae. albopictus | India          |
| OK465351.1 | Ae. albopictus | China          |
| MZ573355.1 | Ae. albopictus | Viet Nam       |
| MZ573348.1 | Ae. albopictus | Viet Nam       |
| MZ573347.1 | Ae. albopictus | Viet Nam       |
| MW228483.1 | Ae. albopictus | China          |
| MK439903.1 | Ae. albopictus | Czech Republic |
| MG913592.1 | Ae. albopictus | Bangladesh     |
| KY765503.1 | Ae. albopictus | China          |
| KY765502.1 | Ae. albopictus | China          |
| KY765500.1 | Ae. albopictus | China          |
| KY765484.1 | Ae. albopictus | China          |
| KY765483.1 | Ae. albopictus | China          |
| KY765474.1 | Ae. albopictus | China          |
| KX886341.1 | Ae. albopictus | China          |
| KX886335.1 | Ae. albopictus | China          |
| KX886332.1 | Ae. albopictus | China          |
| KX886328.1 | Ae. albopictus | China          |
| KX886323.1 | Ae. albopictus | China          |
| KX886319.1 | Ae. albopictus | China          |
| KX886316.1 | Ae. albopictus | China          |
| KX886315.1 | Ae. albopictus | China          |
| KX886313.1 | Ae. albopictus | China          |
| KX886309.1 | Ae. albopictus | China          |
| KX886298.1 | Ae. albopictus | China          |
| KX886296.1 | Ae. albopictus | China          |

|            |                |                                  |
|------------|----------------|----------------------------------|
| KX886295.1 | Ae. albopictus | China                            |
| KX886294.1 | Ae. albopictus | China                            |
| KX886293.1 | Ae. albopictus | China                            |
| KX886290.1 | Ae. albopictus | China                            |
| KX886289.1 | Ae. albopictus | China                            |
| KX886288.1 | Ae. albopictus | China                            |
| KX886286.1 | Ae. albopictus | China                            |
| KX886285.1 | Ae. albopictus | China                            |
| KX886325.1 | Ae. albopictus | China                            |
| LC054326.1 | Ae. albopictus | Japan                            |
| LC054323.1 | Ae. albopictus | Japan                            |
| OK465340.1 | Ae. albopictus | China                            |
| MT345387.1 | Ae. albopictus | Democratic Republic of the Congo |
| MZ573346.1 | Ae. albopictus | Viet Nam                         |
| MW702546.1 | Ae. albopictus | spain                            |
| MN514831.1 | Ae. albopictus | USA                              |
| KY765499.1 | Ae. albopictus | China                            |
| KY765482.1 | Ae. albopictus | China                            |
| KY765481.1 | Ae. albopictus | China                            |
| KY765458.1 | Ae. albopictus | China                            |
| KY765457.1 | Ae. albopictus | China                            |
| KY765456.1 | Ae. albopictus | China                            |
| KX886333.1 | Ae. albopictus | China                            |
| KX886330.1 | Ae. albopictus | China                            |
| KX886327.1 | Ae. albopictus | China                            |
| KX886326.1 | Ae. albopictus | China                            |
| KX886322.1 | Ae. albopictus | China                            |
| KX886321.1 | Ae. albopictus | China                            |
| KX886318.1 | Ae. albopictus | China                            |
| KX886297.1 | Ae. albopictus | China                            |
| KX886291.1 | Ae. albopictus | China                            |
| KX886287.1 | Ae. albopictus | China                            |
| MH025950.1 | Ae. albopictus | Republic of the Congo            |
| OM131689.1 | Ae. albopictus | Japan                            |
| OM131688.1 | Ae. albopictus | Japan                            |
| OM131685.1 | Ae. albopictus | Japan                            |
| OM131684.1 | Ae. albopictus | Japan                            |
| OM131683.1 | Ae. albopictus | Japan                            |
| OM131680.1 | Ae. albopictus | Japan                            |
| OM131679.1 | Ae. albopictus | Japan                            |
| OM131675.1 | Ae. albopictus | Japan                            |
| OK465313.1 | Ae. albopictus | China                            |
| OK465311.1 | Ae. albopictus | China                            |



|            |                |                                  |
|------------|----------------|----------------------------------|
| MT345385.1 | Ae. albopictus | Democratic Republic of the Congo |
| MG921177.1 | Ae. albopictus | Laos                             |
| MT434292.1 | Ae. albopictus | Viet Nam                         |
| MH921569.1 | Ae. albopictus | Cameroon                         |
| KX981868.1 | Ae. albopictus | China                            |
| KX886340.1 | Ae. albopictus | China                            |
| KX886339.1 | Ae. albopictus | China                            |
| KM613097.1 | Ae. albopictus | Thailand                         |
| KF406431.1 | Ae. albopictus | Pakistan                         |
| MN509201.1 | Ae. albopictus | USA                              |
| LC431230.1 | Ae. albopictus | spain                            |
| MH025949.1 | Ae. albopictus | Republic of the Congo            |
| OM131678.1 | Ae. albopictus | Japan                            |
| KF406446.1 | Ae. albopictus | Pakistan                         |
| MT345388.1 | Ae. albopictus | Democratic Republic of the Congo |
| MH921570.1 | Ae. albopictus | Cameroon                         |
| KU522419.1 | Ae. albopictus | Morocco                          |
| KM613107.1 | Ae. albopictus | Thailand                         |
| KM613099.1 | Ae. albopictus | Thailand                         |
| MW577640.1 | Ae. albopictus | Algeria                          |
| MH025948.1 | Ae. albopictus | Republic of the Congo            |
| KU522420.1 | Ae. albopictus | Morocco                          |
| KF406563.1 | Ae. albopictus | Pakistan                         |
| KF406546.1 | Ae. albopictus | Pakistan                         |
| MT434293.1 | Ae. albopictus | Viet Nam                         |
| MK714003.1 | Ae. albopictus | Turkey                           |
| MK598757.1 | Ae. albopictus | India                            |
| LC431229.1 | Ae. albopictus | spain                            |
| OK465243.1 | Ae. albopictus | China                            |
| MH921571.1 | Ae. albopictus | Cameroon                         |
| MH921568.1 | Ae. albopictus | Cameroon                         |
| KX886292.1 | Ae. albopictus | China                            |
| KM613092.1 | Ae. albopictus | Thailand                         |
| LC428095.1 | Ae. albopictus | spain                            |
| MH921572.1 | Ae. albopictus | Cameroon                         |
| KX886329.1 | Ae. albopictus | China                            |
| MH330188.1 | Ae. albopictus | Sri Lanka                        |
| LC428094.1 | Ae. albopictus | spain                            |
| KF406509.1 | Ae. albopictus | Pakistan                         |
| EU259306.1 | Ae. albopictus | India                            |
| KY817536.1 | Ae. albopictus | Malaysia                         |
| KX266695.1 | Ae. albopictus | China                            |
| KF406567.1 | Ae. albopictus | Pakistan                         |

|                |                |           |
|----------------|----------------|-----------|
| KF406467.1     | Ae. albopictus | Pakistan  |
| KY817525.1     | Ae. albopictus | Malaysia  |
| KX981867.1     | Ae. albopictus | China     |
| KF406453.1     | Ae. albopictus | Pakistan  |
| KF406430.1     | Ae. albopictus | Pakistan  |
| MN509206.1     | Ae. albopictus | USA       |
| OK090993.1     | Ae. albopictus | Benin     |
| KT211235.1     | Ae. albopictus | Malaysia  |
| KY817565.1     | Ae. albopictus | Malaysia  |
| KF406476.1     | Ae. albopictus | Pakistan  |
| KF406568.1     | Ae. albopictus | Pakistan  |
| KF406483.1     | Ae. albopictus | Pakistan  |
| XR 003892638.1 | Ae. albopictus | Italy     |
| KT211242.1     | Ae. albopictus | Malaysia  |
| KT211240.1     | Ae. albopictus | Malaysia  |
| KT211237.1     | Ae. albopictus | Malaysia  |
| KT211236.1     | Ae. albopictus | Malaysia  |
| KT211233.1     | Ae. albopictus | Malaysia  |
| KT211230.1     | Ae. albopictus | Malaysia  |
| KT211227.1     | Ae. albopictus | Malaysia  |
| KT211221.1     | Ae. albopictus | Malaysia  |
| KF406481.1     | Ae. albopictus | Pakistan  |
| KY817563.1     | Ae. albopictus | Malaysia  |
| KF406473.1     | Ae. albopictus | Pakistan  |
| KF406484.1     | Ae. albopictus | Pakistan  |
| KT211241.1     | Ae. albopictus | Pakistan  |
| KT211239.1     | Ae. albopictus | Pakistan  |
| KT211238.1     | Ae. albopictus | Pakistan  |
| KT211231.1     | Ae. albopictus | Pakistan  |
| KT211229.1     | Ae. albopictus | Pakistan  |
| KT211228.1     | Ae. albopictus | Pakistan  |
| KT211226.1     | Ae. albopictus | Pakistan  |
| KT211225.1     | Ae. albopictus | Pakistan  |
| KU926300.1     | Ae. albopictus | Mauritius |
| KF406458.1     | Ae. albopictus | Pakistan  |
| KY817535.1     | Ae. albopictus | Malaysia  |
| KF406436.1     | Ae. albopictus | Pakistan  |
| OL437325.1     | Ae. albopictus | USA       |
| MW577638.1     | Ae. albopictus | Algeria   |
| KT211234.1     | Ae. albopictus | Malaysia  |
| KT211232.1     | Ae. albopictus | Malaysia  |
| KT211224.1     | Ae. albopictus | Malaysia  |
| KT211223.1     | Ae. albopictus | Malaysia  |

|            |                |                 |
|------------|----------------|-----------------|
| KF406485.1 | Ae. albopictus | Pakistan        |
| JF810659.1 | Ae. albopictus | Greece          |
| KU926301.1 | Ae. albopictus | Italy           |
| KF406561.1 | Ae. albopictus | Pakistan        |
| KF406456.1 | Ae. albopictus | Pakistan        |
| MK714007.1 | Ae. albopictus | Turkey          |
| KF406529.1 | Ae. albopictus | Pakistan        |
| KF406482.1 | Ae. albopictus | Pakistan        |
| KF406429.1 | Ae. albopictus | Pakistan        |
| KT211222.1 | Ae. albopictus | Malaysia        |
| MG198595.2 | Ae. albopictus | Russia          |
| KF406451.1 | Ae. albopictus | Pakistan        |
| KF406433.1 | Ae. albopictus | Pakistan        |
| MK429687.1 | Ae. albopictus | Italy           |
| MT541179.1 | Ae. albopictus | China           |
| KM457524.1 | Ae. albopictus | The Netherlands |
| KM502245.1 | Ae. albopictus | China           |
| MG198601.2 | Ae. albopictus | Russia          |
| KF406442.1 | Ae. albopictus | Pakistan        |
| MK429679.1 | Ae. albopictus | Italy           |
| KX886324.1 | Ae. albopictus | China           |
| KF406578.1 | Ae. albopictus | Pakistan        |
| MT541439.1 | Ae. albopictus | China           |
| MT541416.1 | Ae. albopictus | China           |
| MT541400.1 | Ae. albopictus | China           |
| MT541399.1 | Ae. albopictus | China           |
| MT541394.1 | Ae. albopictus | China           |
| MT541377.1 | Ae. albopictus | China           |
| MT541308.1 | Ae. albopictus | China           |
| MT541235.1 | Ae. albopictus | China           |
| MT541208.1 | Ae. albopictus | China           |
| MT541198.1 | Ae. albopictus | China           |
| MT541189.1 | Ae. albopictus | China           |
| MT541188.1 | Ae. albopictus | China           |
| MT541165.1 | Ae. albopictus | China           |
| MT541161.1 | Ae. albopictus | China           |
| KM502239.1 | Ae. albopictus | China           |
| MK429690.1 | Ae. albopictus | Italy           |
| MW577645.1 | Ae. albopictus | Algeria         |
| MW577643.1 | Ae. albopictus | Algeria         |
| MK429692.1 | Ae. albopictus | Italy           |
| MK429680.1 | Ae. albopictus | Italy           |
| MT541477.1 | Ae. albopictus | China           |

|            |                |            |
|------------|----------------|------------|
| MT541474.1 | Ae. albopictus | China      |
| MT541448.1 | Ae. albopictus | China      |
| MT541443.1 | Ae. albopictus | China      |
| MT541442.1 | Ae. albopictus | China      |
| MT541424.1 | Ae. albopictus | China      |
| MT541407.1 | Ae. albopictus | China      |
| MT541404.1 | Ae. albopictus | China      |
| MT541398.1 | Ae. albopictus | China      |
| MT541384.1 | Ae. albopictus | China      |
| MT541380.1 | Ae. albopictus | China      |
| MT541370.1 | Ae. albopictus | China      |
| MT541365.1 | Ae. albopictus | China      |
| MT541310.1 | Ae. albopictus | China      |
| MT541286.1 | Ae. albopictus | China      |
| MT541275.1 | Ae. albopictus | China      |
| MT541267.1 | Ae. albopictus | China      |
| MT541261.1 | Ae. albopictus | China      |
| MT541246.1 | Ae. albopictus | China      |
| MT541236.1 | Ae. albopictus | China      |
| MT541233.1 | Ae. albopictus | China      |
| MT541230.1 | Ae. albopictus | China      |
| MT541224.1 | Ae. albopictus | China      |
| MT541181.1 | Ae. albopictus | China      |
| MH885495.1 | Ae. albopictus | Bangladesh |
| KM502241.1 | Ae. albopictus | China      |
| KF406527.1 | Ae. albopictus | Pakistan   |
| MT541498.1 | Ae. albopictus | China      |
| MT541368.1 | Ae. albopictus | China      |
| MT541282.1 | Ae. albopictus | China      |
| MT541271.1 | Ae. albopictus | China      |
| MT541270.1 | Ae. albopictus | China      |
| KU497592.1 | Ae. albopictus | China      |
| KM502237.1 | Ae. albopictus | China      |
| KF406542.1 | Ae. albopictus | Pakistan   |
| MN540322.1 | Ae. albopictus | Malaysia   |
| MN509207.1 | Ae. albopictus | USA        |
| MT541164.1 | Ae. albopictus | China      |
| HM102286.1 | Ae. albopictus | USA        |
| KU497590.1 | Ae. albopictus | China      |
| KM502240.1 | Ae. albopictus | China      |
| MZ828134.1 | Ae. albopictus | India      |
| MZ828133.1 | Ae. albopictus | India      |
| MT541170.1 | Ae. albopictus | China      |

|            |                |            |
|------------|----------------|------------|
| KY817527.1 | Ae. albopictus | Malaysia   |
| KF406508.1 | Ae. albopictus | Pakistan   |
| KF406470.1 | Ae. albopictus | Pakistan   |
| MW577641.1 | Ae. albopictus | Algeria    |
| KU497591.1 | Ae. albopictus | China      |
| MF059293.1 | Ae. albopictus | Malta      |
| KY817560.1 | Ae. albopictus | Malaysia   |
| KM502244.1 | Ae. albopictus | China      |
| MT278262.1 | Ae. albopictus | Algeria    |
| MN064773.1 | Ae. albopictus | Palestine  |
| MN064772.1 | Ae. albopictus | Palestine  |
| MN064771.1 | Ae. albopictus | Palestine  |
| MN064770.1 | Ae. albopictus | Palestine  |
| MN064769.1 | Ae. albopictus | Palestine  |
| MN064768.1 | Ae. albopictus | Palestine  |
| MN064767.1 | Ae. albopictus | Palestine  |
| MN064766.1 | Ae. albopictus | Palestine  |
| MN064765.1 | Ae. albopictus | Palestine  |
| MN064764.1 | Ae. albopictus | Palestine  |
| MN064763.1 | Ae. albopictus | Palestine  |
| MN064762.1 | Ae. albopictus | Palestine  |
| MN064761.1 | Ae. albopictus | Palestine  |
| MN064760.1 | Ae. albopictus | Palestine  |
| MN064759.1 | Ae. albopictus | Palestine  |
| MN064757.1 | Ae. albopictus | Palestine  |
| MN064756.1 | Ae. albopictus | Palestine  |
| MN064755.1 | Ae. albopictus | Palestine  |
| MN064754.1 | Ae. albopictus | Palestine  |
| KF406554.1 | Ae. albopictus | Pakistan   |
| KX266676.1 | Ae. albopictus | China      |
| KF406424.1 | Ae. albopictus | Pakistan   |
| KF406409.1 | Ae. albopictus | Pakistan   |
| KX495910.1 | Ae. albopictus | Viet Nam   |
| KF406521.1 | Ae. albopictus | Pakistan   |
| KF406516.1 | Ae. albopictus | Pakistan   |
| MK518354.1 | Ae. albopictus | Serbia     |
| KF135494.1 | Ae. albopictus | Mayotte    |
| KX495925.1 | Ae. albopictus | Viet Nam   |
| KX495923.1 | Ae. albopictus | Viet Nam   |
| KX495915.1 | Ae. albopictus | Viet Nam   |
| KX495911.1 | Ae. albopictus | Viet Nam   |
| KX573912.1 | Ae. albopictus | Viet Nam   |
| JN406797.1 | Ae. albopictus | Madagascar |

|            |                |            |
|------------|----------------|------------|
| JN406666.1 | Ae. albopictus | Madagascar |
| JN406654.1 | Ae. albopictus | Reunion    |
| DQ310142.1 | Ae. albopictus | India      |
| MN064753.1 | Ae. albopictus | Palestine  |
| KY817537.1 | Ae. albopictus | Malaysia   |
| KX573911.1 | Ae. albopictus | Viet Nam   |
| KX495924.1 | Ae. albopictus | Viet Nam   |
| JN406805.1 | Ae. albopictus | Madagascar |
| JN406796.1 | Ae. albopictus | Madagascar |
| JN406691.1 | Ae. albopictus | Madagascar |
| JN406664.1 | Ae. albopictus | Madagascar |
| JN406659.1 | Ae. albopictus | Reunion    |
| MN064758.1 | Ae. albopictus | Palestine  |
| MF101840.1 | Ae. albopictus | ecuador    |
| KY817555.1 | Ae. albopictus | Malaysia   |
| KF406464.1 | Ae. albopictus | Pakistan   |
| JN406729.1 | Ae. albopictus | Madagascar |
| JN406795.1 | Ae. albopictus | Madagascar |
| JN406675.1 | Ae. albopictus | Madagascar |
| MK377015.1 | Ae. albopictus | India      |
| KY817556.1 | Ae. albopictus | Malaysia   |
| KY817554.1 | Ae. albopictus | Malaysia   |
| KF406408.1 | Ae. albopictus | Pakistan   |
| JN406661.1 | Ae. albopictus | Reunion    |
| KY817544.1 | Ae. albopictus | Malaysia   |
| KY817564.1 | Ae. albopictus | Malaysia   |
| KP211400.1 | Ae. albopictus | brazil     |
| MG198596.1 | Ae. albopictus | Russia     |
| JN406657.1 | Ae. albopictus | Reunion    |
| KY378915.1 | Ae. albopictus | China      |
| JN406658.1 | Ae. albopictus | Reunion    |
| JN406655.1 | Ae. albopictus | Reunion    |
| KY378938.1 | Ae. albopictus | China      |
| KY378914.1 | Ae. albopictus | China      |
| JN406656.1 | Ae. albopictus | Reunion    |
| KY378937.1 | Ae. albopictus | China      |
| KY378934.1 | Ae. albopictus | China      |
| KY378933.1 | Ae. albopictus | China      |
| KY378931.1 | Ae. albopictus | China      |
| KY378930.1 | Ae. albopictus | China      |
| KY378929.1 | Ae. albopictus | China      |
| KY378928.1 | Ae. albopictus | China      |
| KY378927.1 | Ae. albopictus | China      |

|            |                |           |
|------------|----------------|-----------|
| KY378926.1 | Ae. albopictus | China     |
| KY378923.1 | Ae. albopictus | China     |
| KY378921.1 | Ae. albopictus | China     |
| KY378916.1 | Ae. albopictus | China     |
| KY378936.1 | Ae. albopictus | China     |
| KY378932.1 | Ae. albopictus | China     |
| KY378925.1 | Ae. albopictus | China     |
| KY378924.1 | Ae. albopictus | China     |
| KY378922.1 | Ae. albopictus | China     |
| KY378919.1 | Ae. albopictus | China     |
| KY817546.1 | Ae. albopictus | Malaysia  |
| KY378920.1 | Ae. albopictus | China     |
| KY378917.1 | Ae. albopictus | China     |
| KP896571.1 | Ae. albopictus | Malaysia  |
| KY817557.1 | Ae. albopictus | Malaysia  |
| KY817540.1 | Ae. albopictus | Malaysia  |
| KY817539.1 | Ae. albopictus | Malaysia  |
| KY817561.1 | Ae. albopictus | Malaysia  |
| KY817532.1 | Ae. albopictus | Malaysia  |
| KF406536.1 | Ae. albopictus | Pakistan  |
| KY817562.1 | Ae. albopictus | Malaysia  |
| KX227736.1 | Ae. albopictus | India     |
| KY817566.1 | Ae. albopictus | Malaysia  |
| KP896554.1 | Ae. albopictus | Malaysia  |
| KF406413.1 | Ae. albopictus | Pakistan  |
| KY817531.1 | Ae. albopictus | Malaysia  |
| KY817528.1 | Ae. albopictus | Malaysia  |
| KX227738.1 | Ae. albopictus | India     |
| KF406443.1 | Ae. albopictus | Pakistan  |
| MN540323.1 | Ae. albopictus | Malaysia  |
| KY817547.1 | Ae. albopictus | Malaysia  |
| KP896560.1 | Ae. albopictus | Malaysia  |
| KY817538.1 | Ae. albopictus | Malaysia  |
| KF406515.1 | Ae. albopictus | Pakistan  |
| MW270081.1 | Ae. albopictus | Indonesia |
| MW270078.1 | Ae. albopictus | Indonesia |
| AJ971003.1 | Ae. albopictus | brazil    |
| AJ971008.1 | Ae. albopictus | France    |
| KP896566.1 | Ae. albopictus | Malaysia  |
| OK637336.1 | Ae. albopictus | USA       |
| MW843029.1 | Ae. albopictus | France    |
| MW843028.1 | Ae. albopictus | France    |
| MW270084.1 | Ae. albopictus | Indonesia |

|            |                |                                  |
|------------|----------------|----------------------------------|
| AJ971010.1 | Ae. albopictus | Viet Nam                         |
| KP896564.1 | Ae. albopictus | Malaysia                         |
| AJ971014.1 | Ae. albopictus | brazil                           |
| AJ971005.1 | Ae. albopictus | USA                              |
| KY817551.1 | Ae. albopictus | Malaysia                         |
| KY817559.1 | Ae. albopictus | Malaysia                         |
| KF406479.1 | Ae. albopictus | Pakistan                         |
| AJ971006.1 | Ae. albopictus | Cambodia                         |
| KP896568.1 | Ae. albopictus | Malaysia                         |
| AJ971009.1 | Ae. albopictus | France                           |
| AJ971007.1 | Ae. albopictus | Madagascar                       |
| MW270139.1 | Ae. albopictus | Indonesia                        |
| MW270133.1 | Ae. albopictus | Indonesia                        |
| KY817523.1 | Ae. albopictus | Malaysia                         |
| KF406514.1 | Ae. albopictus | Pakistan                         |
| AJ971015.1 | Ae. albopictus | Thailand                         |
| AJ971012.1 | Ae. albopictus | Reunion                          |
| MW270145.1 | Ae. albopictus | Indonesia                        |
| AJ971011.1 | Ae. albopictus | USA                              |
| OK637343.1 | Ae. albopictus | USA                              |
| KY817542.1 | Ae. albopictus | Malaysia                         |
| KY817543.1 | Ae. albopictus | Malaysia                         |
| AJ971013.1 | Ae. albopictus | Reunion                          |
| KY817541.1 | Ae. albopictus | Malaysia                         |
| KY817529.1 | Ae. albopictus | Malaysia                         |
| MK182261.1 | Ae. albopictus | Pakistan                         |
| KY817550.1 | Ae. albopictus | Malaysia                         |
| KF657725.1 | Ae. albopictus | Belgium                          |
| MT345349.1 | Ae. albopictus | Democratic Republic of the Congo |
| KY817545.1 | Ae. albopictus | Malaysia                         |
| JX649856.1 | Ae. albopictus | India                            |
| MT345390.1 | Ae. albopictus | Democratic Republic of the Congo |
| HF536717.1 | Ae. albopictus | Romania                          |
| KT260198.1 | Ae. albopictus | India                            |
| OK637342.1 | Ae. albopictus | USA                              |
| KT260197.1 | Ae. albopictus | India                            |
| KP334275.1 | Ae. albopictus | Indonesia                        |
| KT260199.1 | Ae. albopictus | India                            |
| KY817548.1 | Ae. albopictus | Malaysia                         |
| KP334274.1 | Ae. albopictus | Indonesia                        |
| JX675570.1 | Ae. albopictus | germany                          |
| AY729984.1 | Ae. albopictus | India                            |
| MT651311.1 | Ae. albopictus | China                            |



|            |                |                 |
|------------|----------------|-----------------|
| MN909291.1 | Ae. albopictus | Pakistan        |
| MT651320.1 | Ae. albopictus | China           |
| MT651319.1 | Ae. albopictus | China           |
| MT651310.1 | Ae. albopictus | China           |
| MT651309.1 | Ae. albopictus | China           |
| MT651301.1 | Ae. albopictus | China           |
| KF406441.1 | Ae. albopictus | Pakistan        |
| MT651325.1 | Ae. albopictus | China           |
| MT651324.1 | Ae. albopictus | China           |
| MT651323.1 | Ae. albopictus | China           |
| MT651322.1 | Ae. albopictus | China           |
| MT651321.1 | Ae. albopictus | China           |
| MT651318.1 | Ae. albopictus | China           |
| MT651317.1 | Ae. albopictus | China           |
| MT651316.1 | Ae. albopictus | China           |
| MT651315.1 | Ae. albopictus | China           |
| MT651314.1 | Ae. albopictus | China           |
| MT651313.1 | Ae. albopictus | China           |
| MT651312.1 | Ae. albopictus | China           |
| MT651308.1 | Ae. albopictus | China           |
| MT651304.1 | Ae. albopictus | China           |
| MT651302.1 | Ae. albopictus | China           |
| MG756656.1 | Ae. albopictus | India           |
| MT651307.1 | Ae. albopictus | China           |
| MT651306.1 | Ae. albopictus | China           |
| MT651305.1 | Ae. albopictus | China           |
| MT651303.1 | Ae. albopictus | China           |
| KY765459.1 | Ae. albopictus | China           |
| KF406459.1 | Ae. albopictus | Pakistan        |
| JX456417.1 | Ae. albopictus | brazil          |
| KF406416.1 | Ae. albopictus | Pakistan        |
| MG756657.1 | Ae. albopictus | India           |
| KY817533.1 | Ae. albopictus | Malaysia        |
| KM457497.1 | Ae. albopictus | The Netherlands |
| HQ398902.1 | Ae. albopictus | Viet Nam        |
| KX886303.1 | Ae. albopictus | China           |
| LN808745.1 | Ae. albopictus | Romania         |
| AY748238.1 | Ae. albopictus | Greece          |
| KM457507.1 | Ae. albopictus | The Netherlands |
| KM457506.1 | Ae. albopictus | The Netherlands |
| KM457503.1 | Ae. albopictus | The Netherlands |
| KM457494.1 | Ae. albopictus | The Netherlands |
| KM457493.1 | Ae. albopictus | The Netherlands |

|            |                |                                  |
|------------|----------------|----------------------------------|
| KY765466.1 | Ae. albopictus | China                            |
| KX886308.1 | Ae. albopictus | China                            |
| KU351080.1 | Ae. albopictus | Iran                             |
| AY748239.1 | Ae. albopictus | Greece                           |
| KY817530.1 | Ae. albopictus | Malaysia                         |
| KX886302.1 | Ae. albopictus | China                            |
| KX886301.1 | Ae. albopictus | China                            |
| KX886300.1 | Ae. albopictus | China                            |
| KX886299.1 | Ae. albopictus | China                            |
| KX966018.1 | Ae. albopictus | algeria                          |
| HF912379.1 | Ae. albopictus | Albania                          |
| HQ906849.1 | Ae. albopictus | Croatia                          |
| AY834241.1 | Ae. albopictus | India                            |
| KM457498.1 | Ae. albopictus | The Netherlands                  |
| KY817526.1 | Ae. albopictus | Malaysia                         |
| KM457499.1 | Ae. albopictus | The Netherlands                  |
| KY765464.1 | Ae. albopictus | China                            |
| KU351081.1 | Ae. albopictus | Iran                             |
| HQ906848.1 | Ae. albopictus | Croatia                          |
| MG770598.1 | Ae. albopictus | India                            |
| MG791857.1 | Ae. albopictus | India                            |
| MG770601.1 | Ae. albopictus | India                            |
| MT345360.1 | Ae. albopictus | Democratic Republic of the Congo |
| HQ906850.1 | Ae. albopictus | Croatia                          |
| KY817534.1 | Ae. albopictus | Malaysia                         |
| GU299770.1 | Ae. albopictus | India                            |
| MT345389.1 | Ae. albopictus | Democratic Republic of the Congo |
| HE820720.1 | Ae. albopictus | Russia                           |
| HQ622905.1 | Ae. albopictus | Reunion                          |
| KC572173.1 | Ae. albopictus | Australia                        |
| KY765465.1 | Ae. albopictus | China                            |
| MG770599.1 | Ae. albopictus | India                            |
| HQ622907.1 | Ae. albopictus | Reunion                          |
| MG736660.1 | Ae. albopictus | India                            |
| KY907293.1 | Ae. albopictus | Christmas Island                 |
| KC572441.1 | Ae. albopictus | Papua New Guinea                 |
| KC572352.1 | Ae. albopictus | Papua New Guinea                 |
| KC572329.1 | Ae. albopictus | Papua New Guinea                 |
| KC572147.1 | Ae. albopictus | Australia                        |
| MW193898.1 | Ae. albopictus | Hungary                          |
| MG198603.1 | Ae. albopictus | Russia                           |
| HQ622904.1 | Ae. albopictus | Seychelles                       |
| KY907378.1 | Ae. albopictus | Solomon Islands                  |

|            |                |                  |
|------------|----------------|------------------|
| KY907377.1 | Ae. albopictus | Malaysia         |
| KY907376.1 | Ae. albopictus | Malaysia         |
| KY907373.1 | Ae. albopictus | Malaysia         |
| KY907368.1 | Ae. albopictus | Malaysia         |
| KY907367.1 | Ae. albopictus | Singapore        |
| KY907366.1 | Ae. albopictus | Fiji             |
| KY907337.1 | Ae. albopictus | Malaysia         |
| KY907291.1 | Ae. albopictus | Myanmar          |
| KC572433.1 | Ae. albopictus | Papua New Guinea |
| KC572192.1 | Ae. albopictus | Australia        |
| KC572152.1 | Ae. albopictus | Australia        |
| KM502236.1 | Ae. albopictus | China            |
| HQ622969.1 | Ae. albopictus | madagascar       |
| HQ622945.1 | Ae. albopictus | Mayotte          |
| HQ622916.1 | Ae. albopictus | Reunion          |
| HQ622939.1 | Ae. albopictus | Mayotte          |
| HQ622919.1 | Ae. albopictus | Reunion          |
| GU299768.1 | Ae. albopictus | India            |
| KY907364.1 | Ae. albopictus | Reunion          |
| KY907336.1 | Ae. albopictus | Malaysia         |
| KY907292.1 | Ae. albopictus | Solomon Islands  |
| KC572330.1 | Ae. albopictus | Papua New Guinea |
| KC572155.1 | Ae. albopictus | Australia        |
| MW509605.1 | Ae. albopictus | Puerto Rico      |
| KY817549.1 | Ae. albopictus | Malaysia         |
| HQ622983.1 | Ae. albopictus | Mauritius        |
| HQ622979.1 | Ae. albopictus | madagascar       |
| HQ622915.1 | Ae. albopictus | Reunion          |
| KY907226.1 | Ae. albopictus | Indonesia        |
| KY907224.1 | Ae. albopictus | Indonesia        |
| KY907222.1 | Ae. albopictus | Australia        |
| KY907221.1 | Ae. albopictus | Indonesia        |
| KY907220.1 | Ae. albopictus | Indonesia        |
| KY907215.1 | Ae. albopictus | Australia        |
| KY907214.1 | Ae. albopictus | Malaysia         |
| KY907195.1 | Ae. albopictus | Papua New Guinea |
| KF042881.1 | Ae. albopictus | East Timor       |
| KC572184.1 | Ae. albopictus | Australia        |
| KC572181.1 | Ae. albopictus | Australia        |
| KC572153.1 | Ae. albopictus | Australia        |
| KC920752.1 | Ae. albopictus | Malaysia         |
| MW283318.1 | Ae. albopictus | Indonesia        |
| MW283317.1 | Ae. albopictus | Indonesia        |

|            |                |           |
|------------|----------------|-----------|
| MW283314.1 | Ae. albopictus | Indonesia |
| MF284803.1 | Ae. albopictus | Slovenia  |
| KU351083.1 | Ae. albopictus | iran      |
| KC920788.1 | Ae. albopictus | Malaysia  |
| KC920787.1 | Ae. albopictus | Malaysia  |
| KC920758.1 | Ae. albopictus | Malaysia  |
| KY817552.1 | Ae. albopictus | Malaysia  |
| FJ372983.1 | Ae. albopictus | India     |
| KY907213.1 | Ae. albopictus | Indonesia |
| KC572218.1 | Ae. albopictus | Australia |
| KC572145.1 | Ae. albopictus | Australia |
| KC920770.1 | Ae. albopictus | Malaysia  |
| KC920768.1 | Ae. albopictus | Malaysia  |
| KC920767.1 | Ae. albopictus | Malaysia  |
| KC920760.1 | Ae. albopictus | Malaysia  |
| KC920753.1 | Ae. albopictus | Malaysia  |
| KC920751.1 | Ae. albopictus | Malaysia  |
| MW283316.1 | Ae. albopictus | Indonesia |
| MW283305.1 | Ae. albopictus | Indonesia |
| KM613121.1 | Ae. albopictus | Thailand  |
| KC920786.1 | Ae. albopictus | Malaysia  |
| KC920783.1 | Ae. albopictus | Malaysia  |
| KC920776.1 | Ae. albopictus | Malaysia  |
| KC920762.1 | Ae. albopictus | Malaysia  |
| KC920757.1 | Ae. albopictus | Malaysia  |
| KC920755.1 | Ae. albopictus | Malaysia  |
| MF767287.1 | Ae. albopictus | Hungary   |
| KC920777.1 | Ae. albopictus | Malaysia  |
| KC920774.1 | Ae. albopictus | Malaysia  |
| KC920772.1 | Ae. albopictus | Malaysia  |
| KC920756.1 | Ae. albopictus | Malaysia  |
| MW283315.1 | Ae. albopictus | Indonesia |
| MW283313.1 | Ae. albopictus | Indonesia |
| MW283309.1 | Ae. albopictus | Indonesia |
| MW283308.1 | Ae. albopictus | Indonesia |
| MW283307.1 | Ae. albopictus | Indonesia |
| MW283306.1 | Ae. albopictus | Indonesia |
| MW283304.1 | Ae. albopictus | Indonesia |
| MW283303.1 | Ae. albopictus | Indonesia |
| KC920782.1 | Ae. albopictus | Malaysia  |
| KC920780.1 | Ae. albopictus | Malaysia  |
| KC920779.1 | Ae. albopictus | Malaysia  |
| KC920778.1 | Ae. albopictus | Malaysia  |

|            |                |                          |
|------------|----------------|--------------------------|
| KC920766.1 | Ae. albopictus | Malaysia                 |
| KC920764.1 | Ae. albopictus | Malaysia                 |
| JF309319.1 | Ae. albopictus | Cameroon                 |
| KC920769.1 | Ae. albopictus | Malaysia                 |
| KC920761.1 | Ae. albopictus | Malaysia                 |
| KC920754.1 | Ae. albopictus | Malaysia                 |
| MW283312.1 | Ae. albopictus | Indonesia                |
| MW283311.1 | Ae. albopictus | Indonesia                |
| MW283310.1 | Ae. albopictus | Indonesia                |
| KC920785.1 | Ae. albopictus | Malaysia                 |
| KC920773.1 | Ae. albopictus | Malaysia                 |
| KC920763.1 | Ae. albopictus | Malaysia                 |
| KC920759.1 | Ae. albopictus | Malaysia                 |
| JF309318.1 | Ae. albopictus | Cameroon                 |
| KC920784.1 | Ae. albopictus | Malaysia                 |
| KC920781.1 | Ae. albopictus | Malaysia                 |
| KC920771.1 | Ae. albopictus | Malaysia                 |
| KY352247.1 | Ae. albopictus | Sri Lanka                |
| KM613085.1 | Ae. albopictus | Thailand                 |
| KM613083.1 | Ae. albopictus | Thailand                 |
| KC920775.1 | Ae. albopictus | Malaysia                 |
| KC920765.1 | Ae. albopictus | Malaysia                 |
| JF309320.1 | Ae. albopictus | Cameroon                 |
| JF309317.1 | Ae. albopictus | Cameroon                 |
| LM999972.1 | Ae. albopictus | Viet Nam                 |
| KY352246.1 | Ae. albopictus | Sri Lanka                |
| KY352245.1 | Ae. albopictus | Sri Lanka                |
| KM613084.1 | Ae. albopictus | Thailand                 |
| KC979142.1 | Ae. albopictus | Central African Republic |
| LM999977.1 | Ae. albopictus | Viet Nam                 |
| LM999976.1 | Ae. albopictus | Viet Nam                 |
| LM999975.1 | Ae. albopictus | France                   |
| LM999974.1 | Ae. albopictus | France                   |
| LM999973.1 | Ae. albopictus | France                   |
| MN824032.1 | Ae. albopictus | China                    |
| KP122847.1 | Ae. albopictus | Malaysia                 |
| KP896573.1 | Ae. albopictus | Malaysia                 |
| KP896572.1 | Ae. albopictus | Malaysia                 |
| KY378918.1 | Ae. albopictus | China                    |
| AY101848.1 | Ae. albopictus | China                    |
| AY100668.1 | Ae. albopictus | China                    |
| MN824028.1 | Ae. albopictus | China                    |
| KY765493.1 | Ae. albopictus | China                    |

|            |                |                          |
|------------|----------------|--------------------------|
| KP122901.1 | Ae. albopictus | Malaysia                 |
| KP122900.1 | Ae. albopictus | Malaysia                 |
| KP122885.1 | Ae. albopictus | Malaysia                 |
| KP122883.1 | Ae. albopictus | Malaysia                 |
| KP122867.1 | Ae. albopictus | Malaysia                 |
| KP122863.1 | Ae. albopictus | Malaysia                 |
| KP122860.1 | Ae. albopictus | Malaysia                 |
| KP122853.1 | Ae. albopictus | Malaysia                 |
| KP122852.1 | Ae. albopictus | Malaysia                 |
| KP122846.1 | Ae. albopictus | Malaysia                 |
| KC979143.1 | Ae. albopictus | Central African Republic |
| KP122859.1 | Ae. albopictus | Malaysia                 |
| OM131687.1 | Ae. albopictus | Japan                    |
| AY101850.1 | Ae. albopictus | China                    |
| AY100666.1 | Ae. albopictus | China                    |
| MN824033.1 | Ae. albopictus | China                    |
| MN824031.1 | Ae. albopictus | China                    |
| MN824030.1 | Ae. albopictus | China                    |
| MN824029.1 | Ae. albopictus | China                    |
| KP122905.1 | Ae. albopictus | Malaysia                 |
| KP122896.1 | Ae. albopictus | Malaysia                 |
| KP122890.1 | Ae. albopictus | Malaysia                 |
| KP122889.1 | Ae. albopictus | Malaysia                 |
| KP122886.1 | Ae. albopictus | Malaysia                 |
| KP122882.1 | Ae. albopictus | Malaysia                 |
| KP122875.1 | Ae. albopictus | Malaysia                 |
| KP122874.1 | Ae. albopictus | Malaysia                 |
| KP122873.1 | Ae. albopictus | Malaysia                 |
| KP122872.1 | Ae. albopictus | Malaysia                 |
| KP122869.1 | Ae. albopictus | Malaysia                 |
| KP122864.1 | Ae. albopictus | Malaysia                 |
| KP122861.1 | Ae. albopictus | Malaysia                 |
| KP122858.1 | Ae. albopictus | Malaysia                 |
| KP122856.1 | Ae. albopictus | Malaysia                 |
| KP122855.1 | Ae. albopictus | Malaysia                 |
| KP122854.1 | Ae. albopictus | Malaysia                 |
| KP122850.1 | Ae. albopictus | Malaysia                 |
| KP122849.1 | Ae. albopictus | Malaysia                 |
| KP122909.1 | Ae. albopictus | Malaysia                 |
| KP122904.1 | Ae. albopictus | Malaysia                 |
| KP122881.1 | Ae. albopictus | Malaysia                 |
| KP122895.1 | Ae. albopictus | Malaysia                 |
| KF406423.1 | Ae. albopictus | Pakistan                 |

|            |                |                  |
|------------|----------------|------------------|
| AY101849.1 | Ae. albopictus | China            |
| AY100667.1 | Ae. albopictus | China            |
| MN824039.1 | Ae. albopictus | China            |
| MN824037.1 | Ae. albopictus | China            |
| MN824036.1 | Ae. albopictus | China            |
| MN824035.1 | Ae. albopictus | China            |
| MN824034.1 | Ae. albopictus | China            |
| MN824027.1 | Ae. albopictus | China            |
| KP122893.1 | Ae. albopictus | Malaysia         |
| KP122888.1 | Ae. albopictus | Malaysia         |
| KP122887.1 | Ae. albopictus | Malaysia         |
| KP122880.1 | Ae. albopictus | Malaysia         |
| KP122878.1 | Ae. albopictus | Malaysia         |
| KP122877.1 | Ae. albopictus | Malaysia         |
| KP122871.1 | Ae. albopictus | Malaysia         |
| KP122870.1 | Ae. albopictus | Malaysia         |
| KP122866.1 | Ae. albopictus | Malaysia         |
| KP122865.1 | Ae. albopictus | Malaysia         |
| KP122857.1 | Ae. albopictus | Malaysia         |
| KP122848.1 | Ae. albopictus | Malaysia         |
| KP122879.1 | Ae. albopictus | Malaysia         |
| KP122907.1 | Ae. albopictus | Malaysia         |
| KP122899.1 | Ae. albopictus | Malaysia         |
| KP122898.1 | Ae. albopictus | Malaysia         |
| MN824038.1 | Ae. albopictus | China            |
| KP122903.1 | Ae. albopictus | Malaysia         |
| KP122876.1 | Ae. albopictus | Malaysia         |
| KP122868.1 | Ae. albopictus | Malaysia         |
| KP122862.1 | Ae. albopictus | Malaysia         |
| KP122851.1 | Ae. albopictus | Malaysia         |
| JQ436969.1 | Ae. albopictus | Viet Nam         |
| JQ436978.1 | Ae. albopictus | Thailand         |
| AJ971004.1 | Ae. albopictus | Viet Nam         |
| MH348258.1 | Ae. albopictus | Balearic Islands |
| KP122906.1 | Ae. albopictus | Malaysia         |
| KP122902.1 | Ae. albopictus | Malaysia         |
| JQ436980.1 | Ae. albopictus | Thailand         |
| JQ436979.1 | Ae. albopictus | Thailand         |
| JQ436977.1 | Ae. albopictus | Thailand         |
| JQ436974.1 | Ae. albopictus | Bhutan           |
| JQ436972.1 | Ae. albopictus | Viet Nam         |
| JQ436970.1 | Ae. albopictus | Viet Nam         |
| JQ436960.1 | Ae. albopictus | Japan            |

|            |                |          |
|------------|----------------|----------|
| MT434294.1 | Ae. albopictus | Viet Nam |
| KP122892.1 | Ae. albopictus | Malaysia |
| KP122884.1 | Ae. albopictus | Malaysia |
| OK465301.1 | Ae. albopictus | China    |
| OK465300.1 | Ae. albopictus | China    |
| OK465271.1 | Ae. albopictus | China    |
| OK465270.1 | Ae. albopictus | China    |
| JQ436975.1 | Ae. albopictus | Bhutan   |
| JQ436973.1 | Ae. albopictus | Viet Nam |
| JQ436971.1 | Ae. albopictus | Viet Nam |
| JQ436966.1 | Ae. albopictus | China    |
| JQ436965.1 | Ae. albopictus | China    |
| JQ436964.1 | Ae. albopictus | China    |
| JQ436961.1 | Ae. albopictus | Japan    |
| KP122891.1 | Ae. albopictus | Malaysia |
| JQ436976.1 | Ae. albopictus | Bhutan   |
| JQ436968.1 | Ae. albopictus | China    |
| JQ436967.1 | Ae. albopictus | China    |
| JQ436963.1 | Ae. albopictus | China    |
| JQ436962.1 | Ae. albopictus | Japan    |
| KP122908.1 | Ae. albopictus | Malaysia |
| OK465293.1 | Ae. albopictus | China    |
| OK465292.1 | Ae. albopictus | China    |
| AY101847.1 | Ae. albopictus | China    |
| KY378935.1 | Ae. albopictus | China    |
| LT221029.1 | Ae. albopictus | Greece   |
| KP122897.1 | Ae. albopictus | Malaysia |
| KP122894.1 | Ae. albopictus | Malaysia |
| OK465269.1 | Ae. albopictus | China    |
| GU299769.1 | Ae. albopictus | India    |
| KF406401.1 | Ae. albopictus | Pakistan |
| MW159865.1 | Ae. albopictus | colombia |
| MW159880.1 | Ae. albopictus | colombia |
| MW159866.1 | Ae. albopictus | colombia |
| KF406418.1 | Ae. albopictus | Pakistan |
| MW159900.1 | Ae. albopictus | colombia |
| MW159899.1 | Ae. albopictus | colombia |
| MW159884.1 | Ae. albopictus | colombia |
| MW159864.1 | Ae. albopictus | colombia |
| MW159901.1 | Ae. albopictus | colombia |
| MW159881.1 | Ae. albopictus | colombia |
| KF406461.1 | Ae. albopictus | Pakistan |
| KF406548.1 | Ae. albopictus | Pakistan |



|                |                |          |
|----------------|----------------|----------|
| MN824041.1     | Ae. albopictus | China    |
| MN909290.1     | Ae. albopictus | Pakistan |
| KF406444.1     | Ae. albopictus | Pakistan |
| MN909288.1     | Ae. albopictus | Pakistan |
| MN824040.1     | Ae. albopictus | China    |
| KJ765612.1     | Ae. albopictus | Malaysia |
| KJ765611.1     | Ae. albopictus | Malaysia |
| MN909289.1     | Ae. albopictus | Pakistan |
| MG515539.1     | Ae. albopictus | China    |
| XR 003899037.1 | Ae. albopictus | Italy    |
| XR 003895456.1 | Ae. albopictus | Italy    |
| XR 003895455.1 | Ae. albopictus | Italy    |
